# Supplementary material for: Upcycling of Waste Sodium Sulfate to Sodium Carbonate and Sulfur
Source: Research Square preprint supplement (doi:10.21203/rs.3.rs-7418874/v1), 2025-09-10
Supplement: Supplementary file 1 [file b5c1937b87ff04b0065091af.docx]

**Supplementary Information**

**Upcycling of Waste Sodium Sulfate to Sodium Carbonate and Sulfur**

Hongya Wang1, Shiyu Wang1, Fengyin Zhou1, Muya Cai1, Jingjing Zhao1, Danfeng Wang1, Zhan Shi4, Xiang Chen1, Dihua Wang1,2,3, Huayi Yin1,2,3*

1. School of Resource and Environmental Science, Wuhan University, 299 Bayi Road, Wuchang District, Wuhan 430072, P. R. China.
2. Hubei International Scientific and Technological Cooperation Base of Sustainable Resource and Energy, Wuhan University, Wuhan 430072, China
3. Joint Center of Green Manufacturing of Energy Storage Materials of Wuhan University and Chilwee, Wuhan 430072, P. R. China
4. Department of Land, Environment, Agriculture and Forestry, University of Padova, Legnaro (PD) 35020, Italy.

***** Corresponding author. Email: yinhuayi@whu.edu.cn (Huayi Yin)

**This PDF file includes:**

Supporting Information **Fig. S1** to **Fig. S28**;

Supporting Information **Tab. S1** to**Tab. S13**.

**Supplementary Table**

**Tab. S1.** The amount of waste Na2SO4 generated in different industrial processes.

| **Industry** | **Product & Consumption** | **Production (kg-Na2SO4/t)** |
| --- | --- | --- |
| **Chemical Industry** | Lithium carbonate | ~2000 |
| Sodium hydroxide | 5~10 |
| Ammonium sulfate | 1~2 |
| Oxalic acid | 500~800 |
| Penicillin | 300~500 |
| Formic acid | 400~600 |
| **Coal Chemical Industry** | Coal (*Burning*) | 30~120 |
| **Paper Industry** | Pulp | 200~400 |
| **Glass Industry** | Glass | ~30 |

The widespread use of H2SO4 and Na-based compounds has resulted in the generation of large amounts of waste Na2SO4. Taking lithium carbonate production as an example, the Li extraction process requires a significant amount of Na2CO3 to produce Li2CO3, generating at least three tons of waste Na2SO4 for every ton of Li2CO3 produced.1 In the coal chemical industry, sulfur combines with carbon to form a CO2 and SO2 mixture. Since SO2 emissions are strictly regulated in most countries and regions, alkaline solutions are used to absorb SO2 to meet emission standards. While Ca-based alkaline compounds are commonly used for SO2 removal, Na-based compounds are still employed in some cases where high removal efficiency is required, as Na-based compounds offer superior SO2 removal performance.2

**Tab. S2.** The amount of Na2CO3 used in the production of various products.

| **Industry** | **Product** | **Amount (kg-Na2CO3/t)** |
| --- | --- | --- |
| **Metallurgical Industry** | Steel | 15~20 |
| Al | ~410 |
| Hard metal | ~1350 |
| Au | 27000 |
| Electrolytic Mg | 0.5 |
| Electrolytic Bi | ~150 |
| Electrolytic Ni | ~80 |
| Refined Sb | 42 |
| Cryolite | ~620 |
| CoCO3 | 3 |
| **Chemical Industry** | Synthetic ammonia | 11.3 |
| Sulfur blue | 767 |
| Epoxy resin | ~400 |
| Polyvinyl chloride | 4 |
| Naphthol | ~230 |
| Chrome yellow | ~700 |
| **Pharmaceutical Industry** | Sulfathiazole | 1120 |
| Sulphaguanidine | 550 |
| Aminopyrine | 1260 |
| Aureomycin | 11400 |
| Tetracycline | 25000 |
| Streptomycin | 21000 |
| **Food Industry** | Soy sauce | ~80 |
| Monosodium glutamate | 120 |
| **Glass Industry** | Glass | ~200 |
| **Dyeing and Finishing Industry** | Cloth | 30~50 |

**Tab. S3.** Life cycle inventory (LCI) of producing soda ash using this process.

| **Inputs/outputs** | **Unit** | **Quantity** | **Comments** |
| --- | --- | --- | --- |
| **Step 1: Dehydration and reduction of sodium sulfate** | | | |
| Inputs | | | |
| Waste Na2SO4·10H2O | kg | 3.04 | Recycling of waste sodium sulfate |
| Transportation | tkm | 0.30 | 100 km transportation |
| Electricity | kWh | 0.08 | Dehydration energy consumption |
| Charcoal | kg | 0.45 | Carbon source |
| CO | kg | 0.26 | CO reuse (from Step 2) |
| Electricity | kWh | 0.54 | Heating energy consumption (750 °C-4h) |
| Outputs | | | |
| Na2S | kg | 0.74 | For Step 2 |
| CO2 | kg | 1.04 | Partial emissions, partially used for Step 2 |
| Charcoal | kg | 0.28 | Excessive charcoal |
| Water | kg | 1.70 | Removed water |
| **Step 2: From sodium sulfide to sodium carbonate** | | | |
| Inputs | | | |
| Na2S | kg | 0.74 | From Step 1 |
| CO2 | kg | 0.83 | From Step 1 |
| Charcoal | kg | 0.28 | Excessive charcoal (not involved in Step 2) |
| Electricity | kWh | 0.24 | Heating energy consumption (300 °C-4h) |
| Outputs | | | |
| Na2CO3 | kg | 1.00 | Product (mixed with charcoal) |
| Charcoal | kg | 0.28 | Excessive charcoal (not involved in Step 2) |
| S | kg | 0.30 | By-product (volatile product) |
| CO | kg | 0.26 | Reuse to Step 1 |
| **Step 3: Purification of Sodium Carbonate** | | | |
| Inputs | | | |
| Na2CO3 | kg | 1.00 | Product (mixed with charcoal) |
| Charcoal | kg | 0.28 | Excessive charcoal (not involved in Step 2) |
| Water | kg | 3.33 | Solubility: 0.45 kg/L (35 °C), margin: 1.5 |
| Electricity | kWh | 0.15 | Evaporation energy consumption (45 kWh/t-H2O) |
| Outputs | | | |
| Na2CO3 | kg | 1.00 | Product |
| Charcoal | kg | 0.28 | Reuse to Step 1 |
| Water | kg | 3.33 | Evaporative water cycle |
| **Overall** | | | |
| Inputs | | | |
| Waste Na2SO4·10H2O | kg | 3.04 | Recycling of waste sodium sulfate |
| Transportation | tkm | 0.30 | 100 km transportation |
| Charcoal | kg | 0.17 | Net input carbon source |
| Electricity | kWh | 1.01 | Used for heating and dehydration |
| Water | kg | 3.33 | Dissolve and separate sodium carbonate |
| Outputs | | | |
| Na2CO3 | kg | 1.00 | Product |
| S | kg | 0.30 | By-product |
| CO2 | kg | 0.21 | Emissions into the atmosphere |
| Water | kg | 5.03 | Evaporative water cycle |

**Tab. S4.** XRF results of purified Na2CO3 product in scale-up production.

| **Components** | **Atomic weight (%)** |
| --- | --- |
| Na | 43.6152 |
| O | 42.8332 |
| C | 13.0906 |
| S | 0.2532 |
| Si | 0.1656 |
| K | 0.0310 |
| Ca | 0.0112 |
| Total | 1 |

**Tab. S5.** XRF results for desulfurization waste.2

| **Components** | **Atomic weight (%)** |  |  |
| --- | --- | --- | --- |
| C | 1.29 | Fe2O3 | 1.04 |
| F | 0.443 | CuO | 0.0108 |
| **Na2O** | **46.9** | ZnO | 0.0236 |
| MgO | 0.051 | SeO2 | 0.0147 |
| Al2O3 | 0.033 | Br | 0.0447 |
| SiO2 | 0.090 | Rb2O | 0.0094 |
| P2O5 | 0.0100 | I | 0.0696 |
| **SO3** | **39.3** | PbO | 0.0818 |
| **Cl** | **7.15** | Others | 0.0384 |
| K2O | 1.26 | Total | 1 |
| CaO | 2.14 |  |  |

**Life cycle assessment**

This study conducted a life cycle assessment (LCA) to assess the environmental impacts and cumulative energy demands of the current sodium carbonate production process compared to the method in this work. The analysis followed the ISO 14040 and 14044 standards and was conducted using SimaPro software.3

In this study, the LCA was developed for the production of 1 kg of Na2CO3 (functional unit). The system boundary includes inputs (energy and materials) and outputs (wastewater, waste gases, and waste) during the Na2CO3 production process, while the production and maintenance of equipment were excluded. The LCI for the Na2CO3 process in this study is presented in Tab. S3. Allocation in multifunctional systems was carried out using the economic allocation method and system expansion method in LCA, where products with higher economic value were allocated a greater share of environmental and resource burdens. The LCI for the compared Na2CO3 production process is based on the global production modeling of the improved Solvay process (Soda Ash process) in the Ecoinvent database.4 The geographic location for electricity and fuel was set to China. Upstream background data for materials were sourced from the Ecoinvent 3.5 database, specifically data representing the Chinese (China, CN) market. When data for the CN region was unavailable, global average (GLO) or other world (ROW) production data were used as substitutes. The electricity data for China in the Ecoinvent database were adjusted. Hydropower, coal-fired power, nuclear power, wind power, solar power, and natural gas power account for 15.4%, 63.1%, 4.8%, 8.7%, 4.9%, and 3.1%, respectively. Additionally, it was assumed that the transportation of Na2SO4·10H2O would be 100 km. Transport was carried out using a truck meeting the EURO6 standard (>32 t).

The energy consumption calculations for different stages in Tab. S3 are as follows (Based on 1000 kg of Na2SO4):

**Step 1:**

*Heating Energy Consumption*

Specific heat capacity of Na2SO4: 898.3 J/(kg·°C)

Specific heat capacity of industrial charcoal: 0.8-1.0 kJ/(kg·°C), with an average value of 900.0 J/(kg·°C).

Specific heat capacity of CO: 1040.4 J/(kg·°C)

Thus, the total energy required to heat the materials to 750°C is 1020689 kJ.

Considering an energy efficiency of 0.75, the calculated total energy required is:

1360918.7 kJ or **378.0 kWh**.

*Constant Temperature Energy Consumption*

The density of Na2SO4 is 2.67 t/m3, and the density of charcoal is approximately 0.4 t/m3. The recycled CO is uniformly input as a gas at a rate of 50 kg per h.

The volume of 1000 kg of Na2SO4 and 338.2 kg of charcoal is calculated as follows:

1000.0 kg Na2SO4 gives a volume of 374.4 L, 338.2 kg charcoal gives a volume of 845.5 L.

Thus, the total volume is approximately: 1219.9 L.

Using a 3000 L furnace for the calculation (Tab. S6), with a porosity of 59.3%.

**Tab. S6.** Design parameters of enlarged furnace in LCA calculation of Na2CO3 production.5

| **Physical entity** | **Symbol** | **Unit** | **3000 L** |
| --- | --- | --- | --- |
| Reaction mixture volume | *V(mix)* | m3 | 3 |
| Height of reactor | *L* | m | 1.614 |
| Diameter of reactor | *D* | m | 1.614 |
| Surface area | *A* | m2 | 12.275 |
| Reactor volume | *V(reactor)* | m3 | 3.3 |
| Insulation material |  |  | Glass fiber |
| Thermal conductivity of insulation | *ka* | W/m·°C | 0.042 |
| Insulation thickness | *s* | m | 0.075 |
| Heat transfer coefficient of insulation | *ka/s* | W/m2·°C | 0.56 |
| Efficiency of heating element | *ηheat* | % | 75% |
| Rate of heat loss | *Aka/s* | W/°C | 6.874 |
| Starting and outside temperature | *T0* = *Tout* | °C | 25 |

*Q*loss = 6.874 W/°C × (750-25) °C × 4h/0.75 = **26.6 kWh**.

Therefore, the total energy consumption for Step 1 is **404.6**  **kWh**.

During the reaction process, heat is continuously released (this energy also contributes to maintaining the reactor’s temperature).

**Step 2:**

Cooling of solid products from 750 °C and CO2 stored at ambient temperature with subsequent heating.

*Specific Heat Capacities*

Specific heat capacity of CO: 843.7 J/(kg·°C).

Na2S is cooled from 750 °C to 300 °C for the reaction, with no additional heating energy required.

With an energy efficiency of 0.75, the total energy consumption for this process is:

191708.3 kJ or **53.3  kWh**.

*Sublimation Heat of Sulfur*

Heat of vaporization for sulfur: 45 kJ/kg.

225.7 kg S × 1403.6 kJ/kg = 316792.5 kJ.

With an energy efficiency of 0.75, the total energy consumption for sulfur sublimation is:

422390.0 kJ or **117.3 kWh**.

*Constant Temperature Energy Consumption*

*Q*loss = 6.874 W/°C × (300-25) °C × 4h/0.75 = **10.1 kWh**.

Therefore, the total energy consumption for Step 2 is **180.7  kWh**.

Considering the by-products (sulfur and distilled water) produced in this process, this study employed both economic allocation and system expansion methods to allocate environmental burdens and credits. The economic allocation method assigns environmental impacts of a multi-product system based on the economic value of the products (e.g., market prices). Products with higher economic values bear a greater share of the environmental burden. The average prices for Na2CO3, Sx powder, and industrial water over the past five years were $270/t, $140/t, and $1/t, respectively. Based on the production quantities shown in Tab. S3, Na2CO3 bears 85% of the total environmental burden of the entire production process. The system expansion method extends the system boundary to include the environmental impact of by-products within the life cycle of the substitute products, thus avoiding allocation issues. Consequently, the additional products are treated as environmental benefits.

This study used the ReCiPe 2016 method to assess the environmental impacts of the Na2CO3 production process, including both mid-point and end-point impact categories. The mid-point impact categories include global warming potential (GWP), stratospheric ozone depletion (ODP), ionizing radiation (IRP), ozone formation, human health (OFHH), fine particulate matter formation (PMFP), terrestrial ecosystems (OFTE), terrestrial acidification potential (TAP), freshwater eutrophication (FEP), marine eutrophication (MEP), terrestrial ecotoxicity (TEP), freshwater ecotoxicity (FETP), marine ecotoxicity (METP), human carcinogenic toxicity (HTPc), human non-carcinogenic toxicity (HTPcn), land use potential (LUP), mineral resource scarcity (SOP), fossil resource scarcity (FFP), and water consumption (WCP). The end-point categories include human health, ecosystems, and resources. The mid-point characterization and normalized environmental impact results for the Na2CO3 production process are shown in Tab.s S7 and S8, respectively. The end-point environmental impact categories and cumulative energy demand are presented in Tab.s S9 and S10. Tab.s S11 and S12 provide an analysis of the environmental impact contributions under different allocation methods.

Monte Carlo simulations were used to evaluate the potential uncertainties in the public database. A total of 1000 Monte Carlo iterations were conducted to represent uncertainty propagation results. Tab. S13 summarizes the uncertainty analysis results for all environmental impact indicators of the sodium carbonate production process, including probabilistic mean, standard deviation, coefficient of variation, and the maximum and minimum values within the 95% confidence interval. The coefficient of variation is used to measure the degree of dispersion around the mean.

**Tab. S7.** Environmental impact assessment results of the Na2CO3 production process.

| **Impact category** | **Unit** | **Economic Allocation Method**  **This Work** | **System Expansion Method**  **This Work** | **SSA-Process** |
| --- | --- | --- | --- | --- |
| Global warming | kg CO2 eq | 1.217612133 | 1.302289566 | 1.650355233 |
| Stratospheric ozone depletion | kg CFC11 eq | 8.60775E-07 | 9.50051E-07 | 2.59394E-07 |
| Ionizing radiation | kBq Co-60 eq | 0.031414655 | 0.034994802 | 0.057701281 |
| Ozone formation, Human health | kg NOx eq | 0.002465418 | 0.002517315 | 0.003526596 |
| Fine particulate matter formation | kg PM2.5 eq | 0.001234235 | 0.001261897 | 0.002171117 |
| Ozone formation, Terrestrial ecosystems | kg NOx eq | 0.002581762 | 0.002647441 | 0.003613473 |
| Terrestrial acidification | kg SO2 eq | 0.002550906 | 0.002623516 | 0.005247758 |
| Freshwater eutrophication | kg P eq | 0.000156881 | 0.000111107 | 0.000417475 |
| Marine eutrophication | kg N eq | 1.63336E-05 | 8.62999E-06 | 0.000885225 |
| Terrestrial ecotoxicity | kg 1,4-DCB | 1.289957376 | 1.067983422 | 7.040595213 |
| Freshwater ecotoxicity | kg 1,4-DCB | 0.013052977 | -0.016941482 | 0.077201833 |
| Marine ecotoxicity | kg 1,4-DCB | 0.017680269 | -0.020203873 | 0.100735199 |
| Human carcinogenic toxicity | kg 1,4-DCB | 0.026803055 | 0.021127847 | 0.086623752 |
| Human non-carcinogenic toxicity | kg 1,4-DCB | 0.393070899 | -0.788867381 | 1.503783927 |
| Land use | m2a crop eq | 0.173932174 | 0.200900427 | 0.030743635 |
| Mineral resource scarcity | kg Cu eq | 0.000508222 | 0.000144101 | 0.005776491 |
| Fossil resource scarcity | kg oil eq | 0.170485394 | 0.17720585 | 0.357981689 |
| Water consumption | m3 | 0.007798293 | 0.004107667 | 0.020978793 |

**Tab. S8.** Normalized environmental impact assessment results of the Na2CO3 production process.

| **Impact category** | **Economic Allocation Method**  **This Work** | **System Expansion Method**  **This Work** | **SSA-Process** |
| --- | --- | --- | --- |
| Global warming | 0.000152202 | 0.000162786 | 0.000206294 |
| Stratospheric ozone depletion | 1.4375E-05 | 1.58658E-05 | 4.33188E-06 |
| Ionizing radiation | 6.53425E-05 | 7.27892E-05 | 0.000120019 |
| Ozone formation, Human health | 0.000119819 | 0.000122341 | 0.000171393 |
| Fine particulate matter formation | 4.82586E-05 | 4.93402E-05 | 8.48907E-05 |
| Ozone formation, Terrestrial ecosystems | 0.000145353 | 0.000149051 | 0.000203439 |
| Terrestrial acidification | 6.22421E-05 | 6.40138E-05 | 0.000128045 |
| Freshwater eutrophication | 0.000241596 | 0.000171105 | 0.000642912 |
| Marine eutrophication | 3.54439E-06 | 1.87271E-06 | 0.000192094 |
| Terrestrial ecotoxicity | 8.48792E-05 | 7.02733E-05 | 0.000463271 |
| Freshwater ecotoxicity | 0.000518203 | -0.000672577 | 0.003064913 |
| Marine ecotoxicity | 0.000406646 | -0.000464689 | 0.00231691 |
| Human carcinogenic toxicity | 0.002602577 | 0.002051514 | 0.008411166 |
| Human non-carcinogenic toxicity | 1.25783E-05 | -2.52438E-05 | 4.81211E-05 |
| Land use | 2.8177E-05 | 3.25459E-05 | 4.98047E-06 |
| Mineral resource scarcity | 4.23349E-09 | 1.20036E-09 | 4.81182E-08 |
| Fossil resource scarcity | 0.000173895 | 0.00018075 | 0.000365141 |
| Water consumption | 2.92436E-05 | 1.54038E-05 | 7.86705E-05 |

**Tab. S9.** End-point environmental impact assessment results of the Na2CO3 production process.

| **Damage category** | **Unit** | **Economic Allocation Method**  **This Work** | **System Expansion Method**  **This Work** | **SSA-Process** |
| --- | --- | --- | --- | --- |
| Total | mPt | 28.11264711 | 25.81085264 | 47.33817152 |
| Human health | mPt | 26.23981098 | 23.82884518 | 44.63262909 |
| Ecosystems | mPt | 1.627619517 | 1.745965691 | 1.92861167 |
| Resources | mPt | 0.245216606 | 0.236041772 | 0.776930757 |

**Tab. S10.** Cumulative energy demand of the Na2CO3 production process.

| **Impact category** | **Unit** | **Economic Allocation Method**  **This Work** | **System Expansion Method**  **This Work** | **SSA-Process** |
| --- | --- | --- | --- | --- |
| Total | MJ | 16.88149282 | 18.560987 | 19.22227223 |
| Non-renewable, fossil | MJ | 7.909572677 | 8.226185668 | 16.50128896 |
| Non-renewable, nuclear | MJ | 0.590009113 | 0.657169616 | 1.083165866 |
| Non-renewable, biomass | MJ | 0.001387016 | 0.001392645 | 0.000548442 |
| Renewable, biomass | MJ | 7.382461759 | 8.59669966 | 0.354598213 |
| Renewable, wind, solar, geothemal | MJ | 0.461787431 | 0.534685022 | 0.523001072 |
| Renewable, water | MJ | 0.536274823 | 0.544854392 | 0.759669675 |

**Tab. S11.** Environmental impact contribution analysis of this work (Based on economic allocation method).

| **Impact category** | **Unit** | **Total** | **Direct emission** | **Transportation** | **Charcoal** | **Electricity** | **Water** |
| --- | --- | --- | --- | --- | --- | --- | --- |
| Global warming | % | 100 | 14.5 | 2.2 | 20.8 | 62.5 | 0.0 |
| Stratospheric ozone depletion | % | 100 | 0.0 | 1.4 | 85.1 | 13.5 | 0.0 |
| Ionizing radiation | % | 100 | 0.0 | 0.9 | 3.8 | 95.2 | 0.0 |
| Ozone formation, Human health | % | 100 | 0.0 | 2.2 | 12.6 | 85.2 | 0.0 |
| Fine particulate matter formation | % | 100 | 0.0 | 2.0 | 10.6 | 87.4 | 0.0 |
| Ozone formation, Terrestrial ecosystems | % | 100 | 0.0 | 2.3 | 15.9 | 81.7 | 0.0 |
| Terrestrial acidification | % | 100 | 0.0 | 1.8 | 6.4 | 91.7 | 0.1 |
| Freshwater eutrophication | % | 100 | 0.0 | 1.5 | 9.7 | 88.4 | 0.3 |
| Marine eutrophication | % | 100 | 0.0 | 4.1 | 33.8 | 58.5 | 3.5 |
| Terrestrial ecotoxicity | % | 100 | 0.0 | 41.1 | 13.1 | 45.8 | 0.0 |
| Freshwater ecotoxicity | % | 100 | 0.0 | 4.9 | 5.8 | 89.2 | 0.1 |
| Marine ecotoxicity | % | 100 | 0.0 | 6.4 | 6.2 | 87.3 | 0.1 |
| Human carcinogenic toxicity | % | 100 | 0.0 | 5.0 | 6.7 | 87.9 | 0.4 |
| Human non-carcinogenic toxicity | % | 100 | 0.0 | 5.5 | 6.3 | 87.9 | 0.3 |
| Land use | % | 100 | 0.0 | 1.1 | 93.1 | 5.8 | 0.0 |
| Mineral resource scarcity | % | 100 | 0.0 | 13.4 | 13.7 | 72.8 | 0.1 |
| Fossil resource scarcity | % | 100 | 0.0 | 5.3 | 5.9 | 88.8 | 0.1 |
| Water consumption | % | 100 | 0.0 | 0.8 | 37.6 | 25.9 | 35.7 |
| Total environmental impact | % | 100 | 7.8 | 2.5 | 17.3 | 72.3 | 0.2 |
| Human health | % | 100 | 7.8 | 2.4 | 16.0 | 73.6 | 0.2 |
| Ecosystems | % | 100 | 8.2 | 2.0 | 38.0 | 51.6 | 0.2 |
| Resources | % | 100 | 0.0 | 16.7 | 13.2 | 70.1 | 0.1 |
| Cumulative energy demand | % | 100 | 0.0 | 2.5 | 46.1 | 51.3 | 0.0 |

**Tab. S12.** Environmental impact contribution analysis of this work (Based on system expansion method).

| **Impact category** | **Unit** | **Total** | **Direct emission** | **Transportation** | **Charcoal** | **Electricity** | **Water** | **Sulfur** | **Cycled water** |
| --- | --- | --- | --- | --- | --- | --- | --- | --- | --- |
| Global warming | % | 100 | 15.9 | 2.4 | 22.9 | 68.7 | 0.0 | -9.9 | -0.1 |
| Stratospheric ozone depletion | % | 100 | 0.0 | 1.5 | 90.7 | 14.4 | 0.0 | -6.6 | 0.0 |
| Ionizing radiation | % | 100 | 0.0 | 1.0 | 4.0 | 100.5 | 0.0 | -5.5 | -0.1 |
| Ozone formation, Human health | % | 100 | 0.0 | 2.5 | 14.5 | 98.1 | 0.1 | -15.1 | -0.1 |
| Fine particulate matter formation | % | 100 | 0.0 | 2.3 | 12.2 | 100.5 | 0.1 | -15.0 | -0.1 |
| Ozone formation, Terrestrial ecosystems | % | 100 | 0.0 | 2.7 | 18.3 | 93.7 | 0.1 | -14.6 | -0.1 |
| Terrestrial acidification | % | 100 | 0.0 | 2.0 | 7.4 | 104.9 | 0.1 | -14.3 | -0.1 |
| Freshwater eutrophication | % | 100 | 0.0 | 2.5 | 16.2 | 146.8 | 0.6 | -65.2 | -0.9 |
| Marine eutrophication | % | 100 | 0.0 | 9.2 | 75.4 | 130.3 | 7.9 | -110.7 | -11.9 |
| Terrestrial ecotoxicity | % | 100 | 0.0 | 58.4 | 18.6 | 65.1 | 0.1 | -42.0 | -0.1 |
| Freshwater ecotoxicity | % | 100 | 0.0 | 4.5 | 5.3 | 80.8 | 0.1 | -190.6 | -0.1 |
| Marine ecotoxicity | % | 100 | 0.0 | 6.6 | 6.3 | 89.9 | 0.1 | -202.8 | -0.1 |
| Human carcinogenic toxicity | % | 100 | 0.0 | 7.4 | 10.0 | 131.3 | 0.6 | -48.3 | -0.9 |
| Human non-carcinogenic toxicity | % | 100 | 0.0 | 3.2 | 3.7 | 51.5 | 0.2 | -158.4 | -0.2 |
| Land use | % | 100 | 0.0 | 1.1 | 94.9 | 5.9 | 0.0 | -1.8 | 0.0 |
| Mineral resource scarcity | % | 100 | 0.0 | 55.7 | 56.7 | 302.2 | 0.3 | -314.4 | -0.5 |
| Fossil resource scarcity | % | 100 | 0.0 | 6.0 | 6.6 | 100.5 | 0.1 | -13.1 | -0.1 |
| Water consumption | % | 100 | 0.0 | 1.8 | 84.0 | 57.8 | 79.7 | -2.9 | -120.4 |
| Total environmental impact | % | 100 | 9.9 | 3.2 | 22.1 | 92.7 | 0.2 | -27.8 | -0.3 |
| Human health | % | 100 | 10.1 | 3.1 | 20.8 | 95.4 | 0.2 | -29.2 | -0.3 |
| Ecosystems | % | 100 | 9.0 | 2.1 | 41.6 | 56.6 | 0.2 | -9.3 | -0.4 |
| Resources | % | 100 | 0.0 | 20.4 | 16.1 | 85.6 | 0.1 | -22.1 | -0.1 |
| Cumulative energy demand | % | 100 | 0.0 | 2.7 | 49.4 | 54.9 | 0.0 | -7.0 | 0.0 |

**Tab. S13.** Summary of uncertainty analysis for this Work and SSA-Process.

| **Economic Allocation Method-This Work** | | | | | | | |
| --- | --- | --- | --- | --- | --- | --- | --- |
| **Impact category** | **Unit** | **Mean** | **Median** | **Standard deviation** | **coefficient of variation (%)** | **2.5%** | **97.5%** |
| Fine particulate matter formation | kg PM2.5 eq | 0.001238664 | 0.001199705 | 0.000242326 | 19.56347611 | 0.000869145 | 0.001848554 |
| Fossil resource scarcity | kg oil eq | 0.172919083 | 0.158613458 | 0.073824338 | 42.6929962 | 0.077914462 | 0.356901644 |
| Freshwater ecotoxicity | kg 1,4-DCB | 0.013074473 | 0.011766179 | 0.005720672 | 43.75451609 | 0.007187579 | 0.026630195 |
| Freshwater eutrophication | kg P eq | 0.000155955 | 0.000118125 | 0.00012981 | 83.235123 | 4.4764E-05 | 0.000492288 |
| Global warming | kg CO2 eq | 1.216781983 | 1.202279982 | 0.1571253 | 12.91318432 | 0.944264087 | 1.570138374 |
| Human carcinogenic toxicity | kg 1,4-DCB | 0.025511905 | 0.020280184 | 0.029826851 | 116.9134634 | 0.00831062 | 0.067385174 |
| Human non-carcinogenic toxicity | kg 1,4-DCB | 0.34000223 | 0.341287138 | 2.50801608 | 737.6469492 | -4.63647497 | 5.277793974 |
| Ionizing radiation | kBq Co-60 eq | 0.033820887 | 0.016966521 | 0.053118272 | 157.0575947 | 0.00326743 | 0.16482552 |
| Land use | m2a crop eq | 0.169094575 | 0.160410897 | 0.143259481 | 84.72151262 | -0.08609479 | 0.468961817 |
| Marine ecotoxicity | kg 1,4-DCB | 0.017685407 | 0.015811011 | 0.007962759 | 45.02445813 | 0.009818683 | 0.036822273 |
| Marine eutrophication | kg N eq | 1.62183E-05 | 1.54504E-05 | 4.53136E-06 | 27.93980905 | 9.67614E-06 | 2.72095E-05 |
| Mineral resource scarcity | kg Cu eq | 0.000506536 | 0.000497303 | 9.82143E-05 | 19.38941564 | 0.000354519 | 0.000738925 |
| Ozone formation, Human health | kg NOx eq | 0.002485638 | 0.002407987 | 0.000586181 | 23.58272828 | 0.001556305 | 0.003832289 |
| Ozone formation, Terrestrial ecosystems | kg NOx eq | 0.002602437 | 0.002519908 | 0.00059784 | 22.97230586 | 0.001647734 | 0.003978454 |
| Stratospheric ozone depletion | kg CFC11 eq | 8.53356E-07 | 7.94284E-07 | 3.03724E-07 | 35.59165459 | 4.24386E-07 | 1.57026E-06 |
| Terrestrial acidification | kg SO2 eq | 0.002552242 | 0.002496476 | 0.000456729 | 17.89519282 | 0.001805638 | 0.003572871 |
| Terrestrial ecotoxicity | kg 1,4-DCB | 1.300542535 | 1.270158378 | 0.201356921 | 15.4825325 | 0.976924273 | 1.791177688 |
| Water consumption | m3 | 0.054123139 | 0.25116357 | 2.568556045 | 4745.763218 | -6.05716465 | 4.349317091 |
| Ecosystems | Pt | 0.001642149 | 0.001879709 | 0.003045449 | 185.4550867 | -0.00474798 | 0.006993773 |
| Human health | Pt | 0.026544231 | 0.028356378 | 0.024816518 | 93.49118912 | -0.0264979 | 0.071038949 |
| Resources | Pt | 0.000242191 | 0.000228417 | 6.85069E-05 | 28.28630044 | 0.000153751 | 0.000423318 |
| Total environmental impact | Pt | 0.028428571 | 0.030915413 | 0.027717088 | 97.49729488 | -0.0301099 | 0.079537853 |
| Cumulative energy demand | MJ | 16.8544446 | 16.1357124 | 4.026352469 | 97.49729488 | 10.9473297 | 26.7923368 |
| **System Expansion Method-This Work** | | | | | | | |
| **Impact category** | **Unit** | **Mean** | **Median** | **Standard deviation** | **coefficient of variation (%)** | **2.5%** | **97.5%** |
| Fine particulate matter formation | kg PM2.5 eq | 0.001264108 | 0.001229675 | 0.000285336 | 22.57213066 | 0.000842357 | 0.001940208 |
| Fossil resource scarcity | kg oil eq | 0.175186588 | 0.158578247 | 0.07919214 | 45.20445387 | 0.069301759 | 0.381391245 |
| Freshwater ecotoxicity | kg 1,4-DCB | -0.017303389 | -0.01673116 | 0.011018526 | -63.67842425 | -0.04123254 | 0.002816448 |
| Freshwater eutrophication | kg P eq | 0.000106571 | 6.81189E-05 | 0.000225551 | 211.6441749 | -2.791E-05 | 0.00043617 |
| Global warming | kg CO2 eq | 1.299913262 | 1.282883155 | 0.19060527 | 14.66292216 | 0.969504683 | 1.744388321 |
| Human carcinogenic toxicity | kg 1,4-DCB | 0.020712076 | 0.014509368 | 0.031252913 | 150.8922298 | 0.000927014 | 0.073993716 |
| Human non-carcinogenic toxicity | kg 1,4-DCB | -0.755618096 | -0.793067442 | 1.919059047 | -253.9720869 | -4.61650894 | 3.053536971 |
| Ionizing radiation | kBq Co-60 eq | 0.032467795 | 0.016789887 | 0.050710722 | 156.1877634 | 0.003739499 | 0.154053648 |
| Land use | m2a crop eq | 0.192379183 | 0.179904586 | 0.152547125 | 79.29502686 | -0.07947687 | 0.539620668 |
| Marine ecotoxicity | kg 1,4-DCB | -0.02066044 | -0.020004247 | 0.014145831 | -68.46820079 | -0.05114541 | 0.00689522 |
| Marine eutrophication | kg N eq | 8.53047E-06 | 7.70675E-06 | 4.93734E-06 | 57.87886329 | 1.42765E-06 | 2.05968E-05 |
| Mineral resource scarcity | kg Cu eq | 0.000146757 | 0.000169867 | 0.000199628 | 136.0262975 | -0.00030801 | 0.000481 |
| Ozone formation, Human health | kg NOx eq | 0.002522371 | 0.002446933 | 0.000718356 | 28.47940515 | 0.001377686 | 0.004149106 |
| Ozone formation, Terrestrial ecosystems | kg NOx eq | 0.002651823 | 0.00258055 | 0.000731898 | 27.59981188 | 0.00147803 | 0.004311486 |
| Stratospheric ozone depletion | kg CFC11 eq | 9.37544E-07 | 8.51857E-07 | 3.69139E-07 | 39.37300677 | 4.7117E-07 | 1.88614E-06 |
| Terrestrial acidification | kg SO2 eq | 0.00261791 | 0.002540702 | 0.000541441 | 20.68217705 | 0.001781741 | 0.003837363 |
| Terrestrial ecotoxicity | kg 1,4-DCB | 1.062089063 | 1.061839955 | 0.275528171 | 25.94209665 | 0.527088243 | 1.603808574 |
| Water consumption | m3 | 0.159307446 | 0.326705668 | 2.815354507 | 1767.246028 | -6.34506624 | 4.978228211 |
| Ecosystems | Pt | 0.001637014 | 0.001868488 | 0.003851329 | 235.2654683 | -0.00659229 | 0.008580917 |
| Human health | Pt | 0.023089183 | 0.024434928 | 0.030245492 | 130.9942109 | -0.04067691 | 0.076547785 |
| Resources | Pt | 0.000234005 | 0.000219404 | 7.71571E-05 | 32.97248128 | 0.000131703 | 0.000439181 |
| Total environmental impact | Pt | 0.024960201 | 0.02638138 | 0.034007264 | 136.2459505 | -0.04618321 | 0.084859001 |
| Cumulative energy demand | MJ | 18.70230182 | 18.02703596 | 4.681195082 | 25.03004778 | 11.92357032 | 29.48944675 |
| **SSA-Process** | | | | | | | |
| **Impact category** | **Unit** | **Mean** | **Median** | **Standard deviation** | **coefficient of variation (%)** | **2.5%** | **97.5%** |
| Fine particulate matter formation | kg PM2.5 eq | 0.002143312 | 0.002061419 | 0.000481376 | 22.45942703 | 0.001414424 | 0.003280092 |
| Fossil resource scarcity | kg oil eq | 0.354947934 | 0.336215651 | 0.104763031 | 29.51504168 | 0.214895609 | 0.633675809 |
| Freshwater ecotoxicity | kg 1,4-DCB | 0.076411204 | 0.067792435 | 0.039709009 | 51.96752102 | 0.029560571 | 0.169675826 |
| Freshwater eutrophication | kg P eq | 0.000415545 | 0.000359056 | 0.000228178 | 54.91037875 | 0.000159003 | 0.001034904 |
| Global warming | kg CO2 eq | 1.64180507 | 1.603656823 | 0.311125876 | 18.95023239 | 1.161947558 | 2.354363945 |
| Human carcinogenic toxicity | kg 1,4-DCB | 0.087378179 | 0.073907798 | 0.081559105 | 93.34035806 | 0.003828981 | 0.233477206 |
| Human non-carcinogenic toxicity | kg 1,4-DCB | 1.206668073 | 0.628289236 | 23.84432932 | 1976.047087 | -45.5161096 | 48.32584343 |
| Ionizing radiation | kBq Co-60 eq | 0.055155834 | 0.030771799 | 0.079697235 | 144.494659 | 0.006082637 | 0.258016573 |
| Land use | m2a crop eq | 0.030337265 | 0.02754805 | 0.013679726 | 45.09215201 | 0.014089926 | 0.06529831 |
| Marine ecotoxicity | kg 1,4-DCB | 0.099754797 | 0.088816174 | 0.051544212 | 51.67091052 | 0.038945296 | 0.219817075 |
| Marine eutrophication | kg N eq | 0.00089269 | 0.000800289 | 0.00039886 | 44.68069439 | 0.000385283 | 0.001904614 |
| Mineral resource scarcity | kg Cu eq | 0.005731373 | 0.005009896 | 0.002975787 | 51.92101132 | 0.002316258 | 0.013723874 |
| Ozone formation, Human health | kg NOx eq | 0.003521729 | 0.003360727 | 0.000900043 | 25.55685158 | 0.002229697 | 0.005637031 |
| Ozone formation, Terrestrial ecosystems | kg NOx eq | 0.003608917 | 0.003442908 | 0.000908012 | 25.16022044 | 0.002287943 | 0.005720348 |
| Stratospheric ozone depletion | kg CFC11 eq | 2.56509E-07 | 2.47017E-07 | 5.85822E-08 | 22.83828558 | 1.69507E-07 | 3.95285E-07 |
| Terrestrial acidification | kg SO2 eq | 0.005209581 | 0.005051999 | 0.001114528 | 21.39380702 | 0.003529713 | 0.007896624 |
| Terrestrial ecotoxicity | kg 1,4-DCB | 6.82714549 | 5.860584297 | 3.937573854 | 57.67525915 | 2.83995455 | 17.49455633 |
| Water consumption | m3 | 0.118194583 | 0.359397688 | 2.366364439 | 2002.092122 | -5.51128421 | 4.517781922 |
| Ecosystems | Pt | 0.001977502 | 0.002244237 | 0.003424147 | 173.1551936 | -0.00523334 | 0.008259317 |
| Human health | Pt | 0.044384016 | 0.043780474 | 0.076170955 | 171.6179864 | -0.10859347 | 0.195344977 |
| Resources | Pt | 0.000771906 | 0.000754956 | 0.000143502 | 18.59063245 | 0.000551205 | 0.001091141 |
| Total environmental impact | Pt | 0.047133424 | 0.046014896 | 0.077533285 | 164.4974589 | -0.10910475 | 0.201149641 |
| Cumulative energy demand | MJ | 19.2629722 | 18.30341143 | 5.173226022 | 26.85580381 | 12.24848586 | 32.23856761 |

**Supplementary Figures**


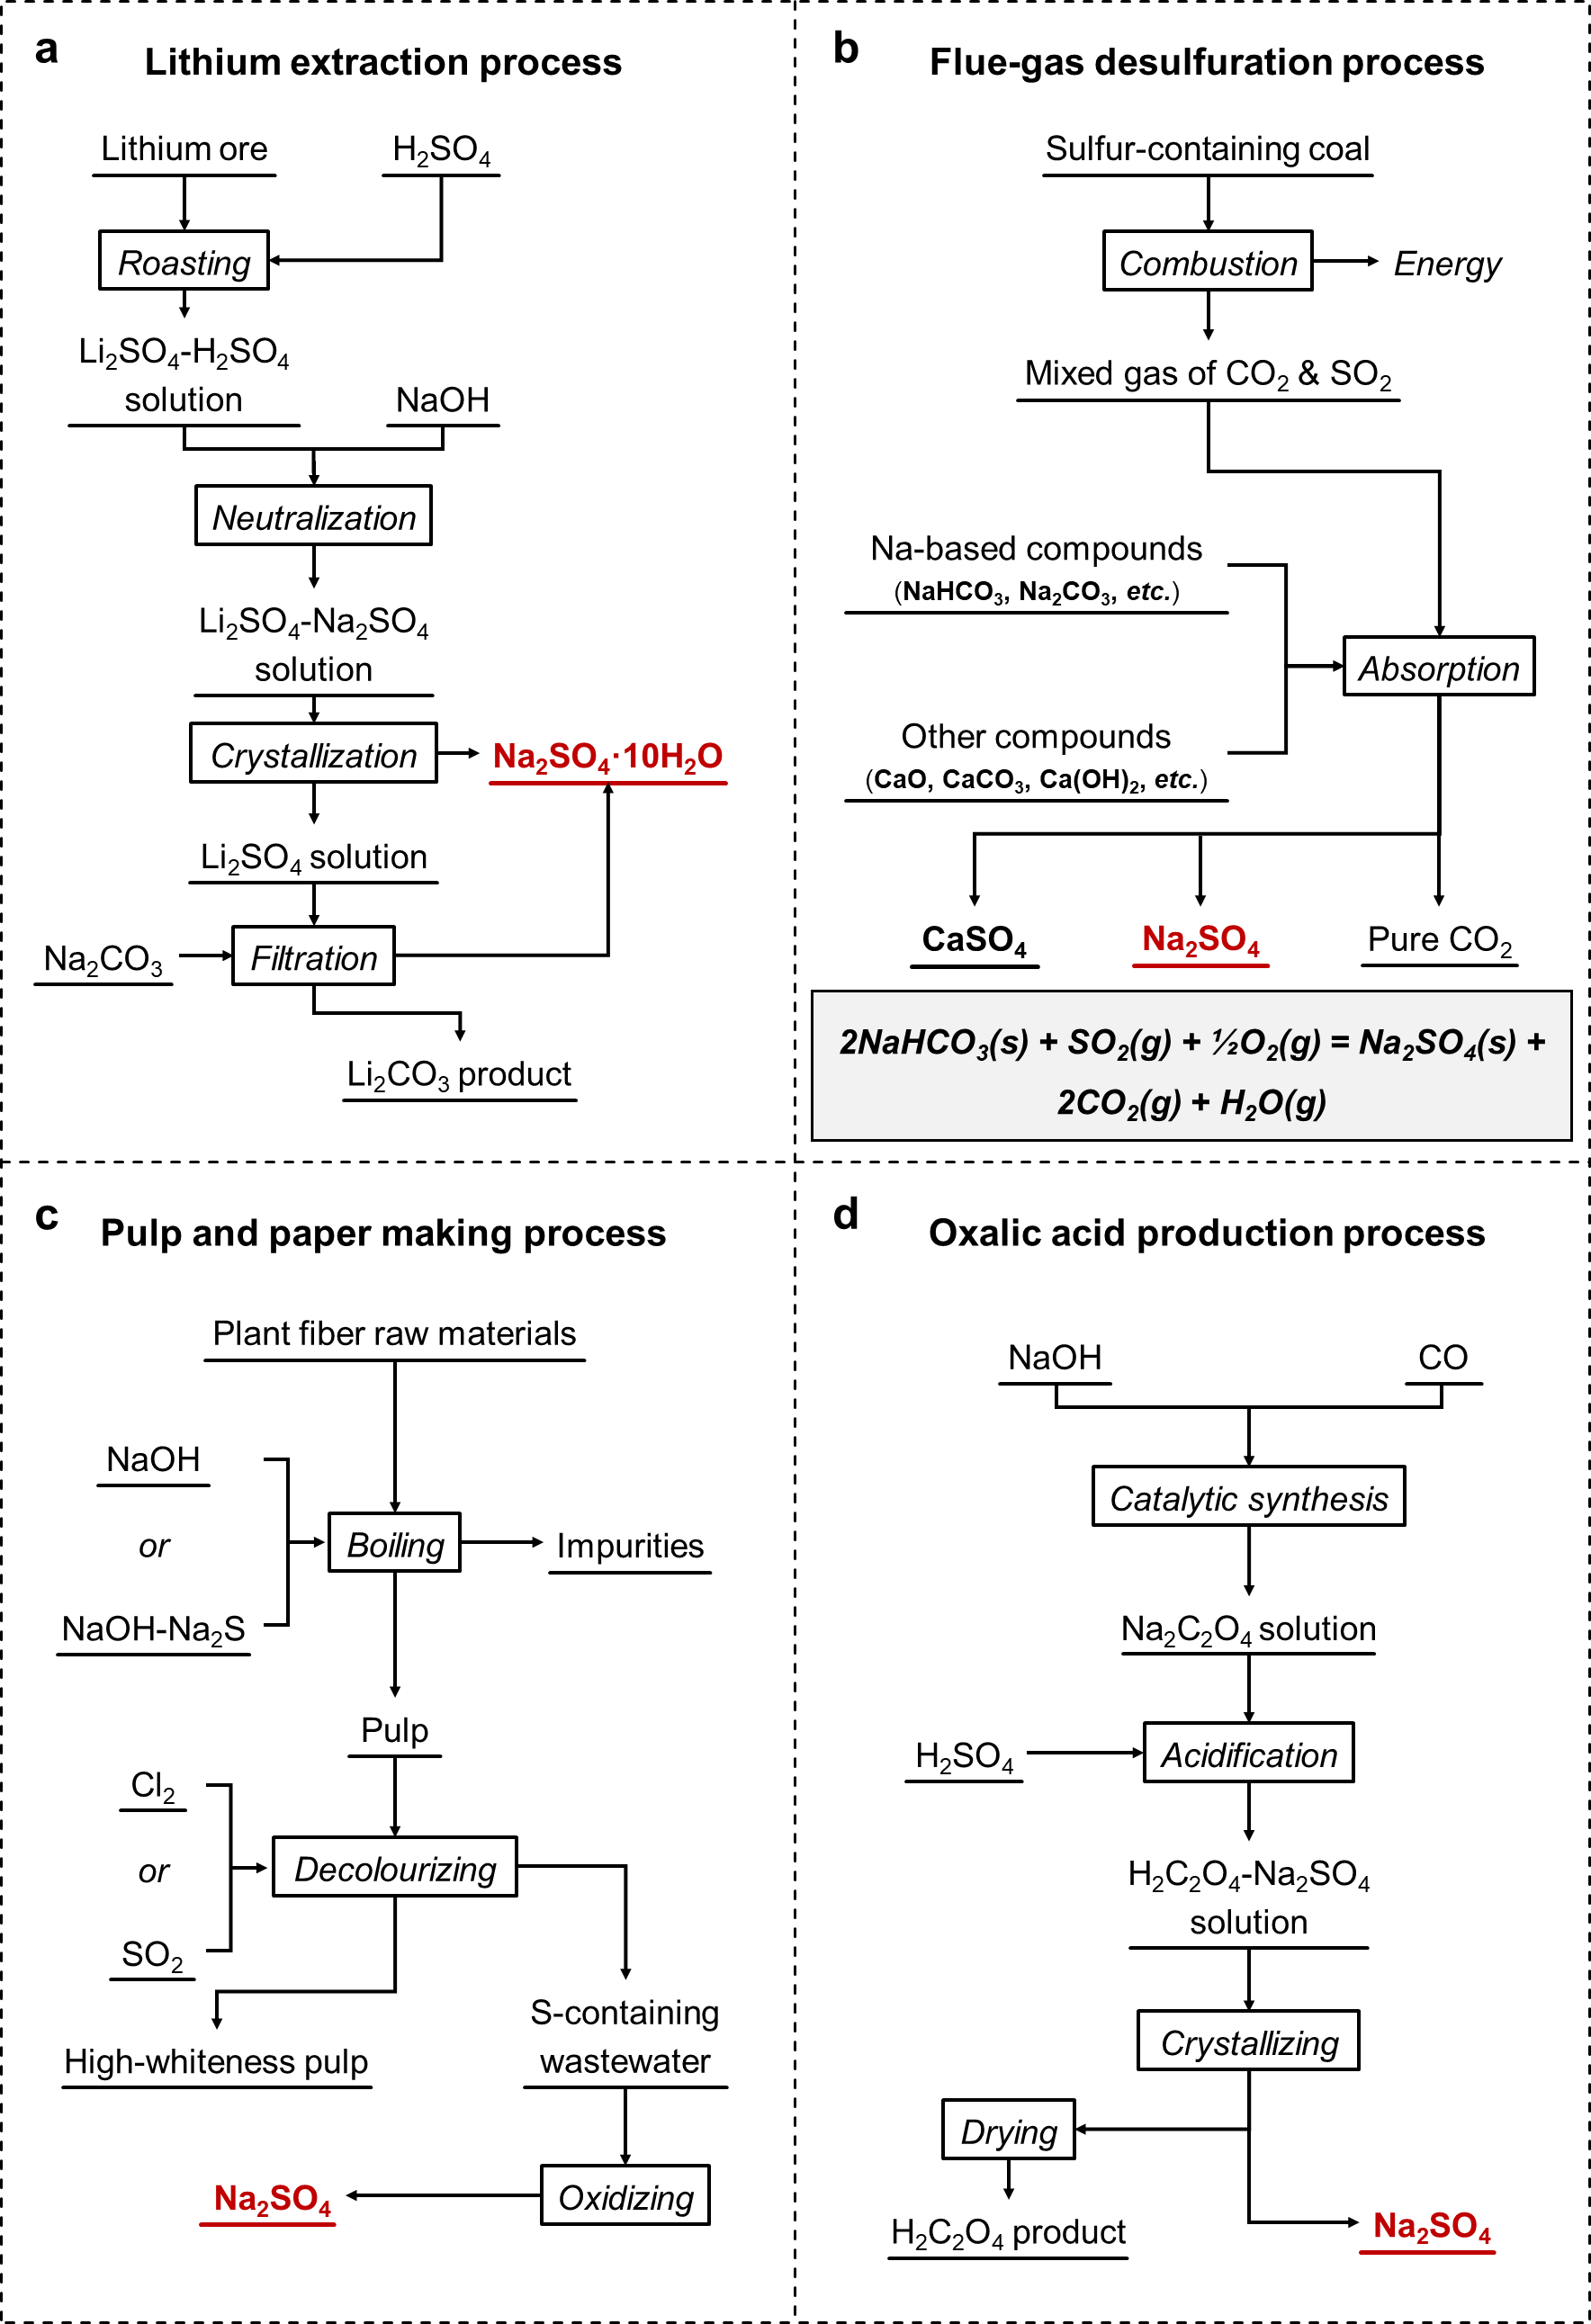


**Fig. S1.** Processes leading to the generation of waste Na2SO4: (a) lithium extraction process, (b) flue-gas desulfurization, (c) pulp and paper production, and (d) oxalic acid production.


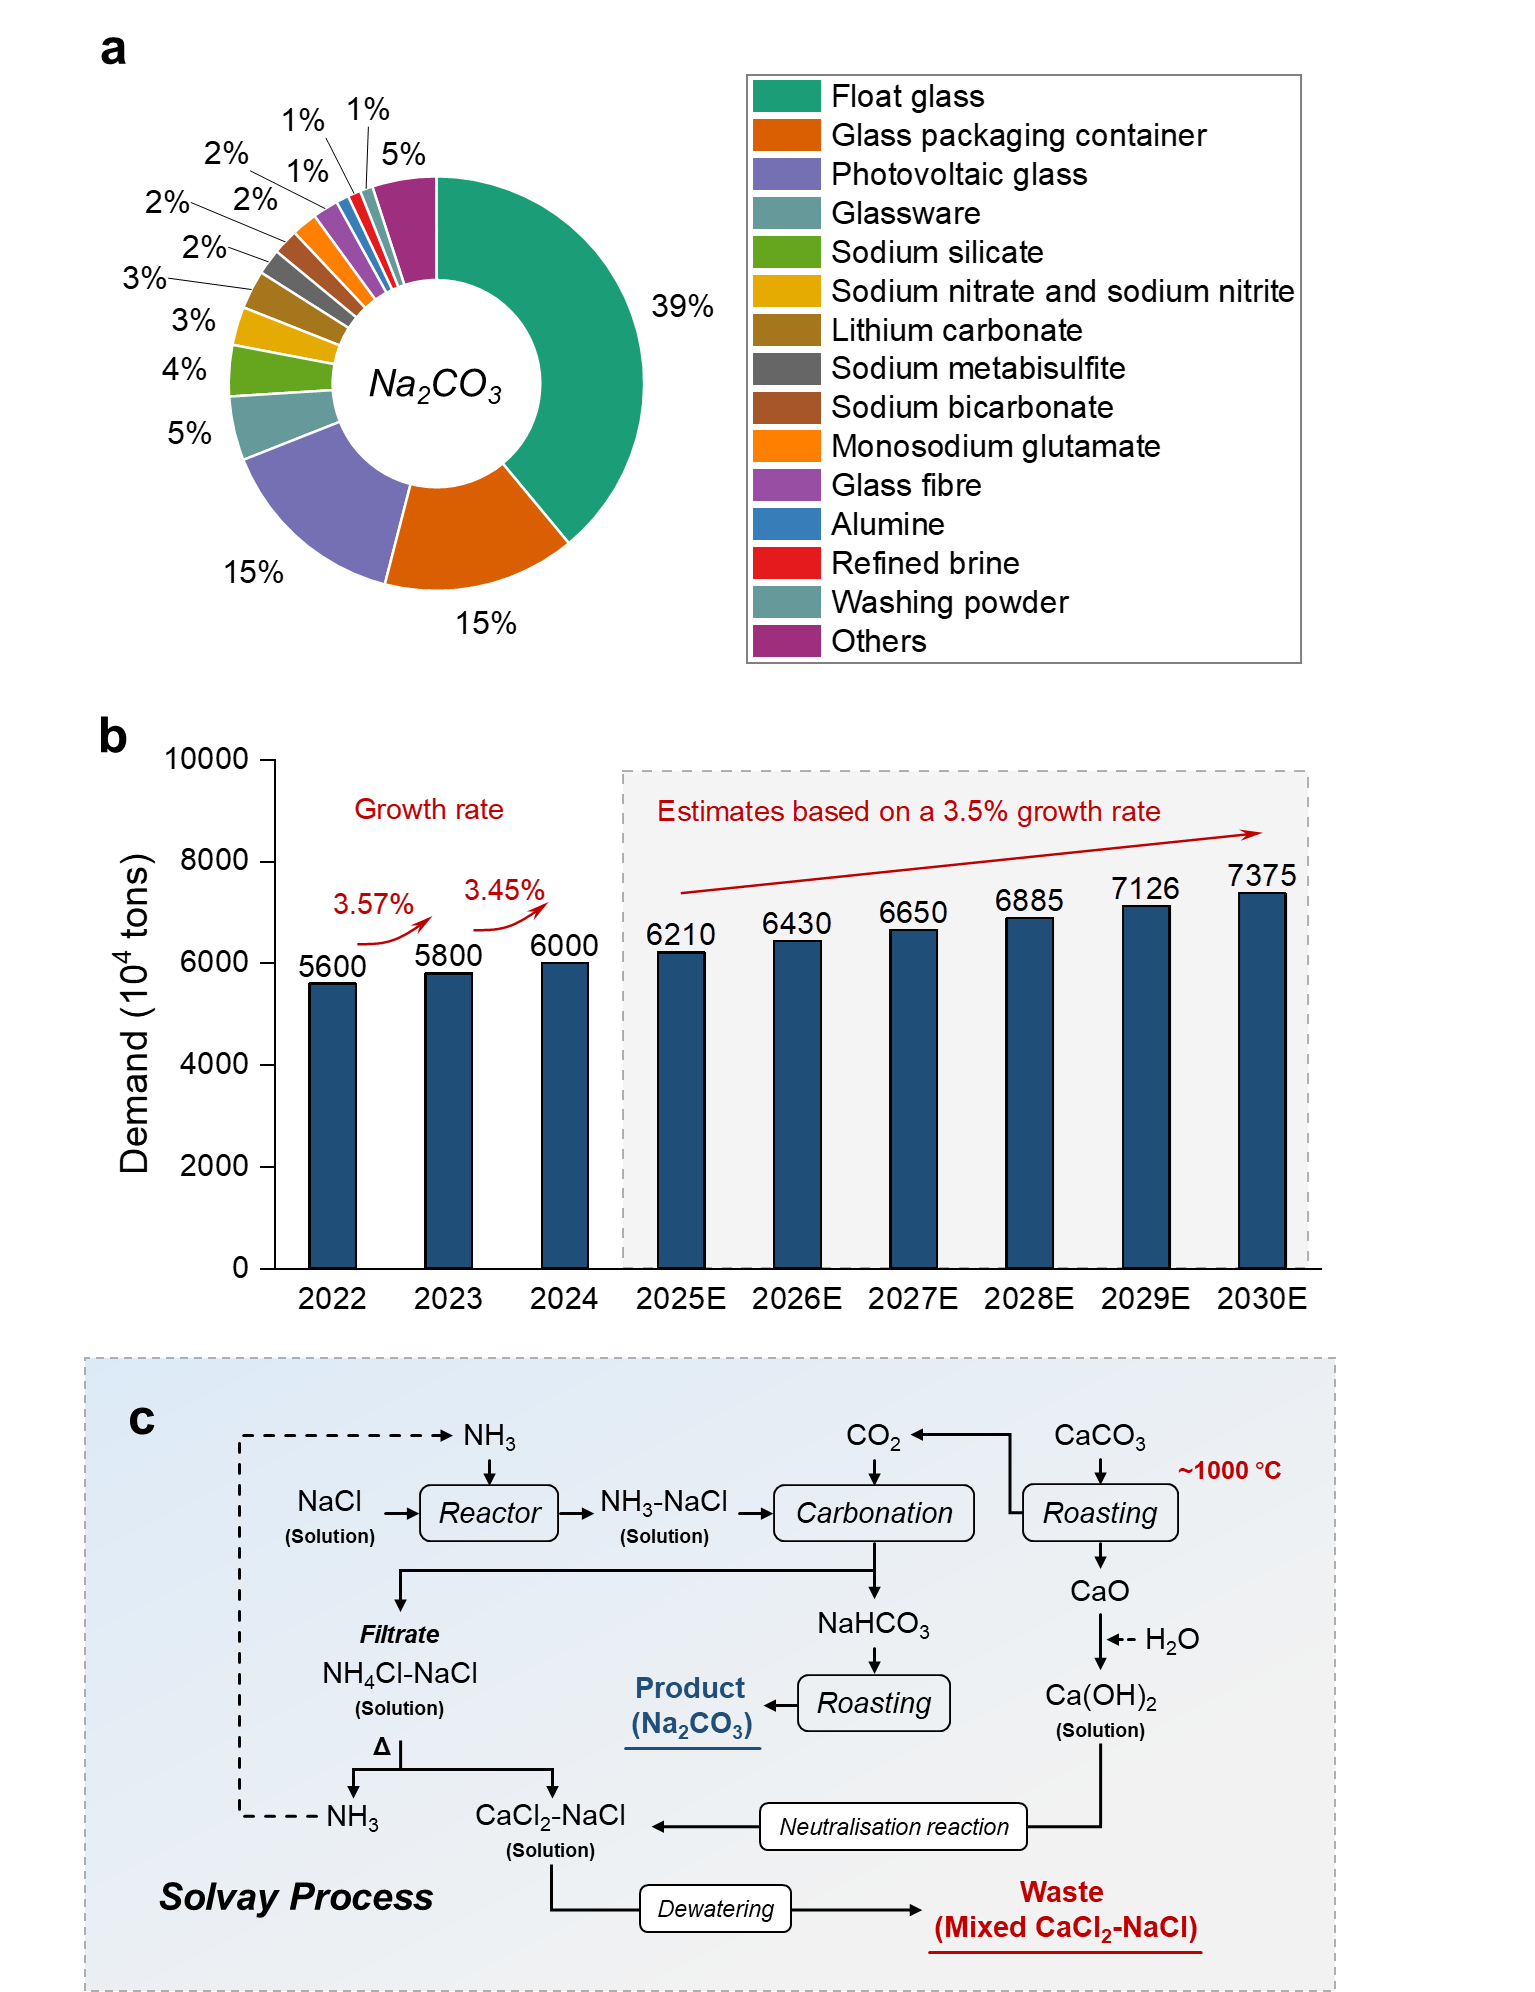


**Fig. S2.** (a) Downstream market structure of Na2CO3 in China in 2023. (b) Analysis of global Na2CO3 demand from 2022 to 2030. (c) Flowchart of the Solvay process.

As shown in Fig. S2a, in 2023, 39% of Na2CO3 consumption in China was for float glass production, followed by glass packaging container and photovoltaic glass. With both the global shift towards renewable photovoltaic energy and the rapid expansion of the electric vehicle market in recent years, the demand for Na2CO3 has continued to rise (Fig. S2b). Traditional Na2CO3 production relies on the Solvay process, which faces multiple challenges related to high energy consumption and waste generation. Consequently, the SSA-Process encounters similar issues to those faced by this conventional method (Fig. S2c).


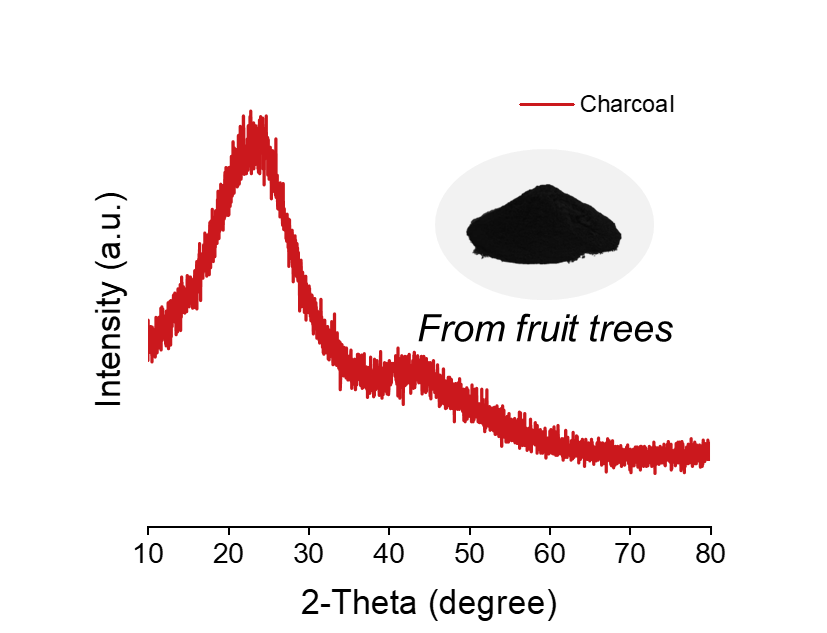


**Fig. S3.** XRD pattern of charcoal derived from the carbonization of cherry wood.


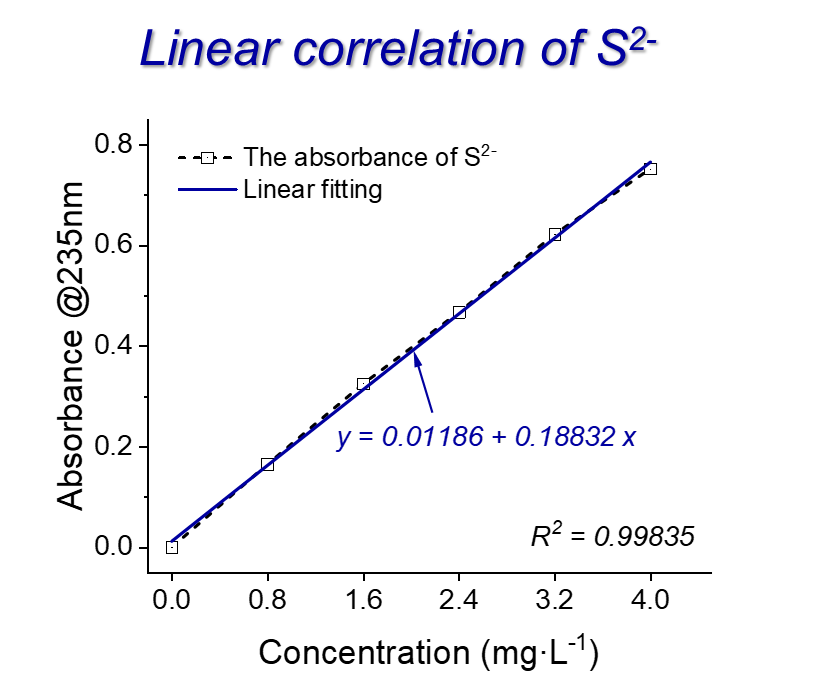


**Fig. S4.** Linear correlation between sulfur ion (S2-) concentration and absorbance at a wavelength of 235 nm.


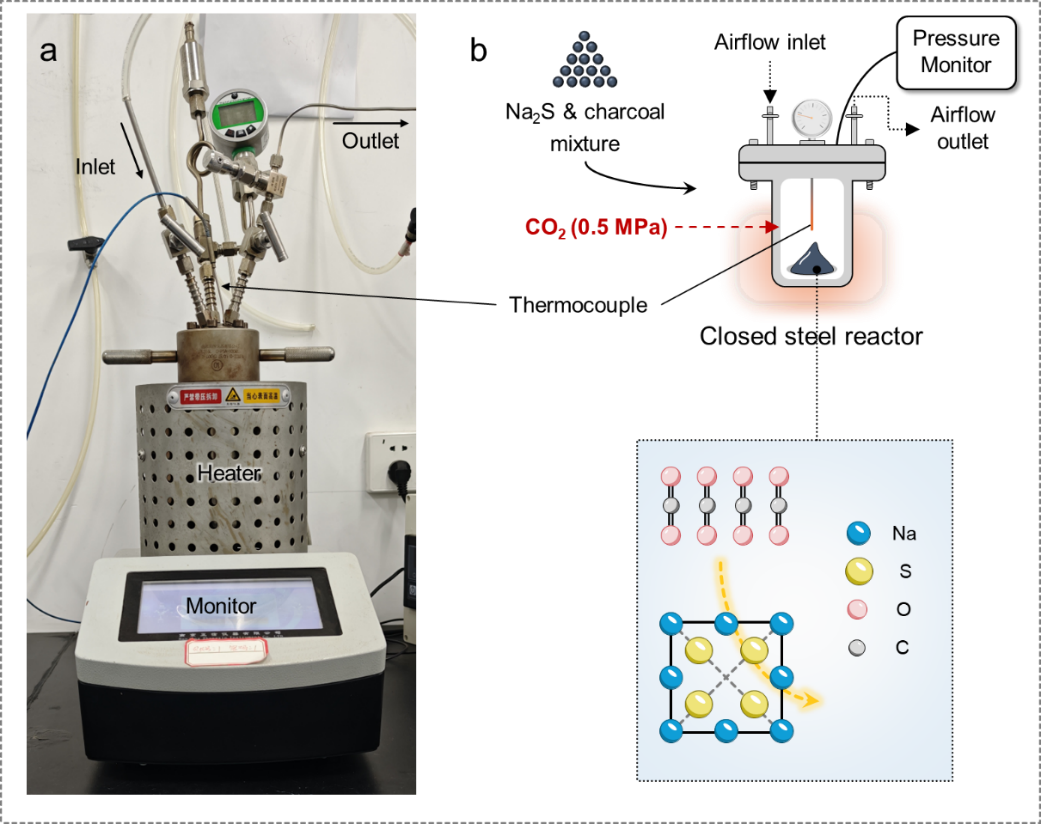


**Fig. S5.** (a) Photograph of the closed steel reactor. (b) Schematic diagram of the Na2S-CO2 reaction system and process.


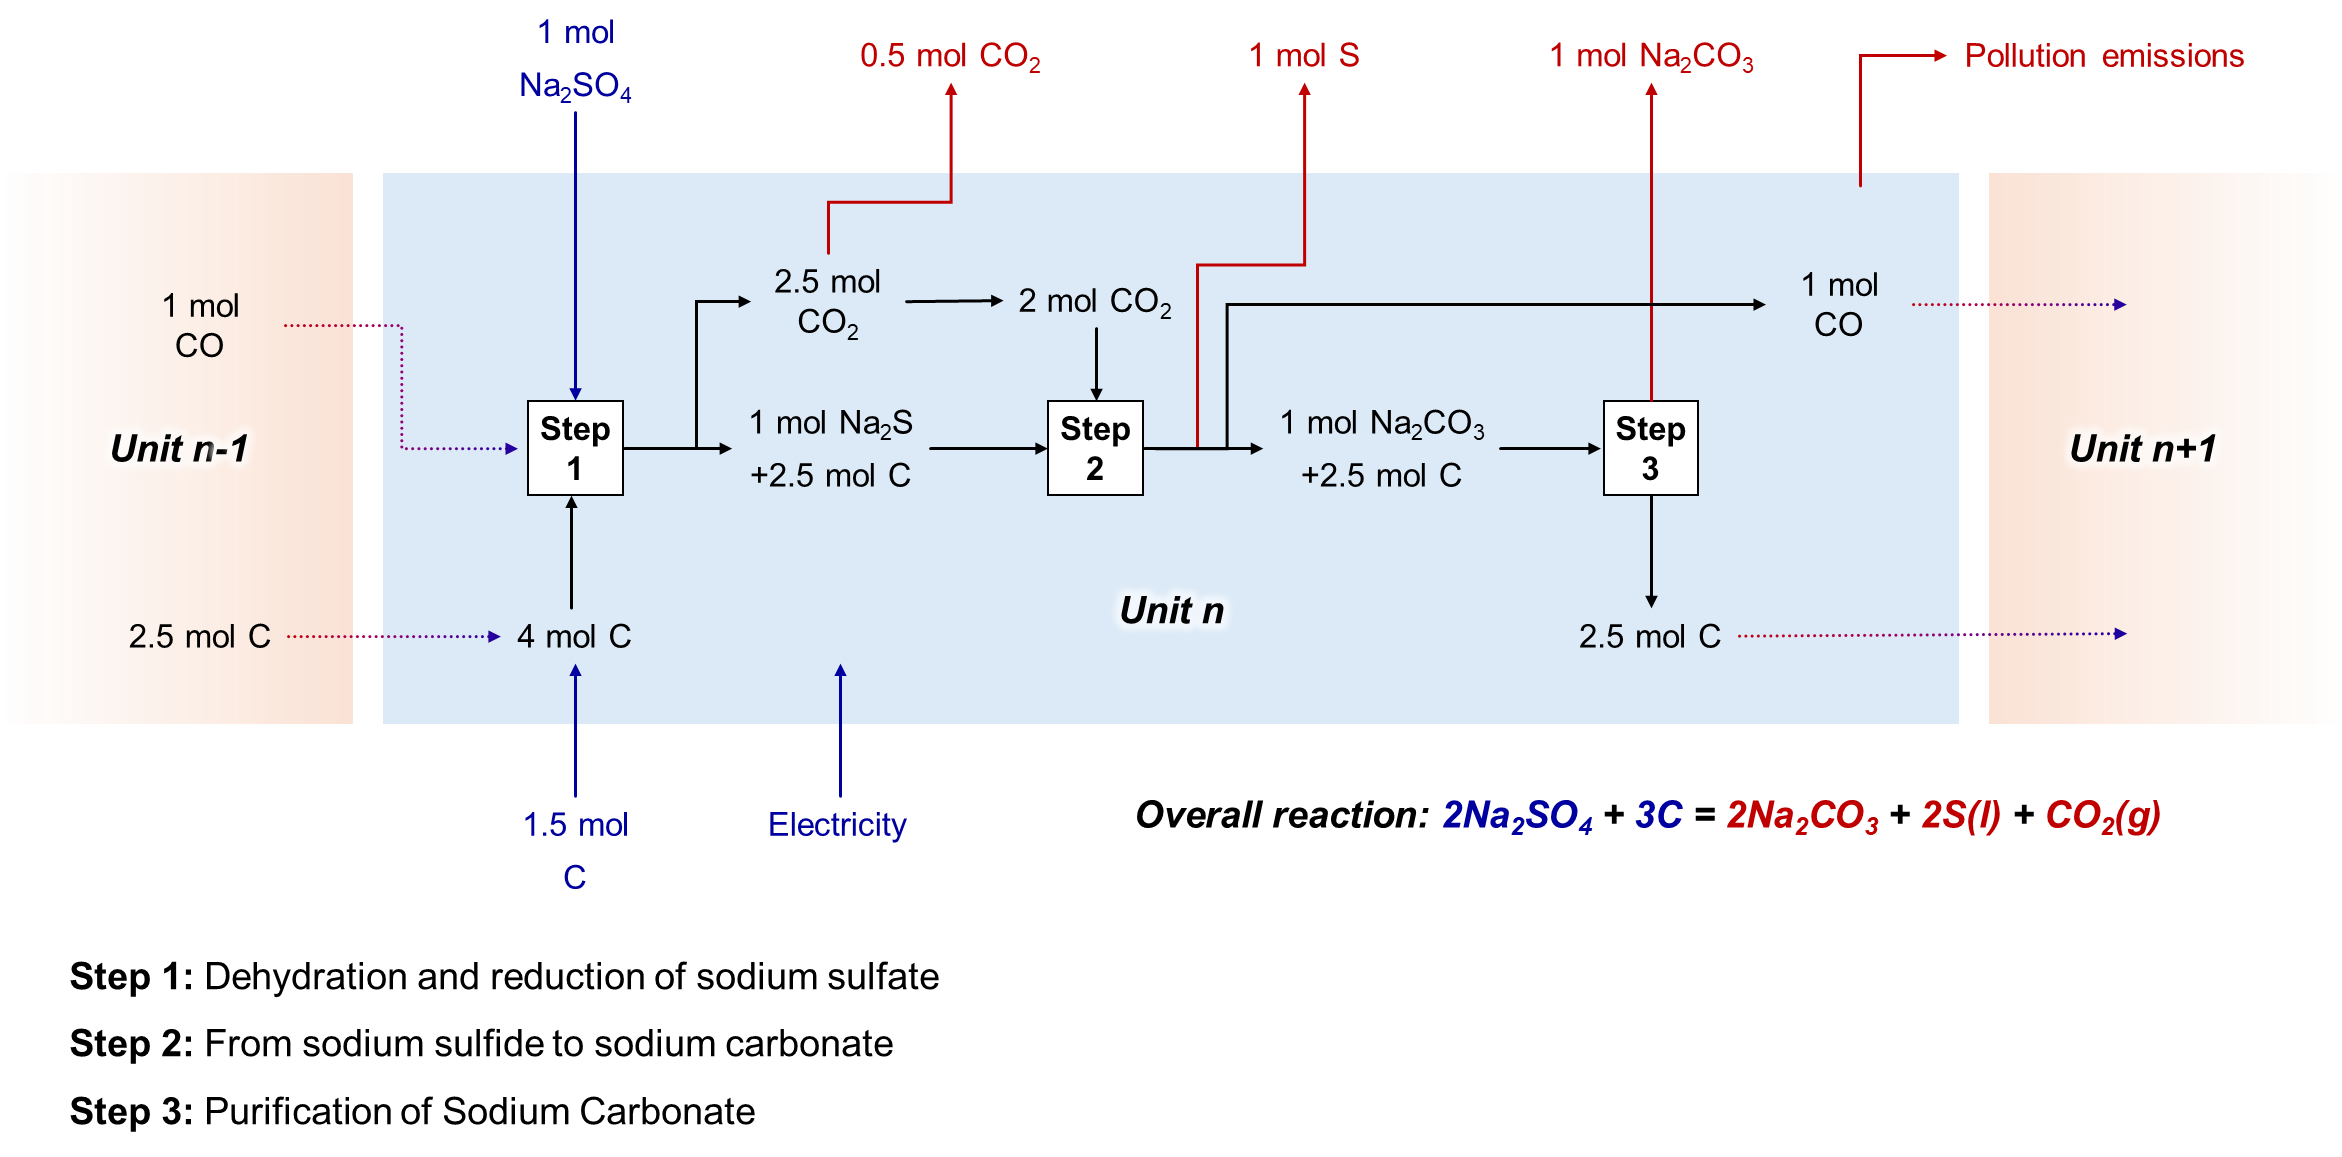


**Fig. S6.** System boundary diagram for the thermochemical production of Na2CO3 from waste Na2SO4 (this study).

**
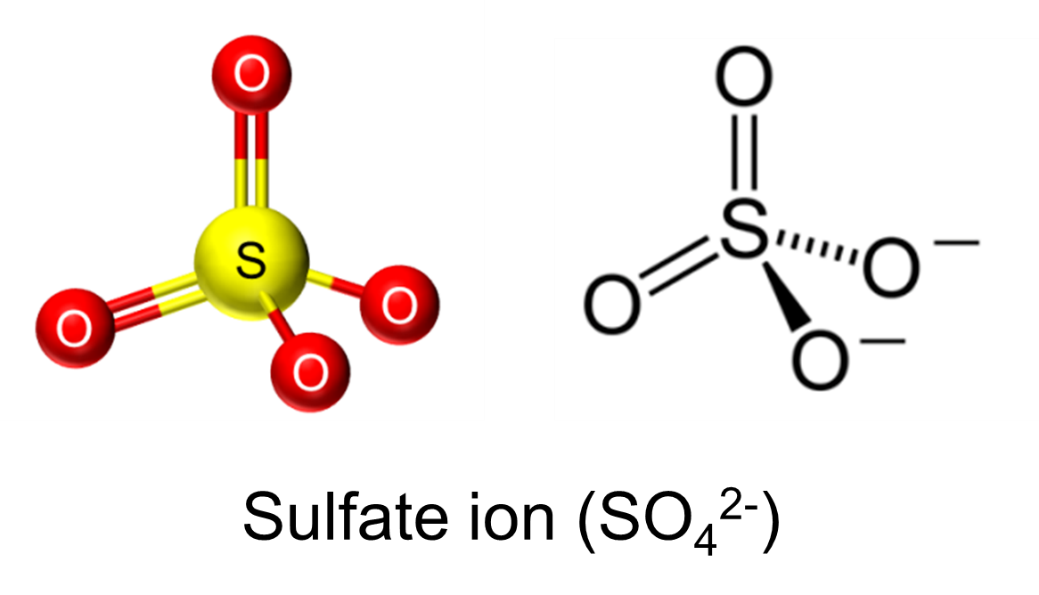
**

**Fig. S7.** Tetrahedral ball-and-stick model of SO42- and its molecular structure diagram.

**
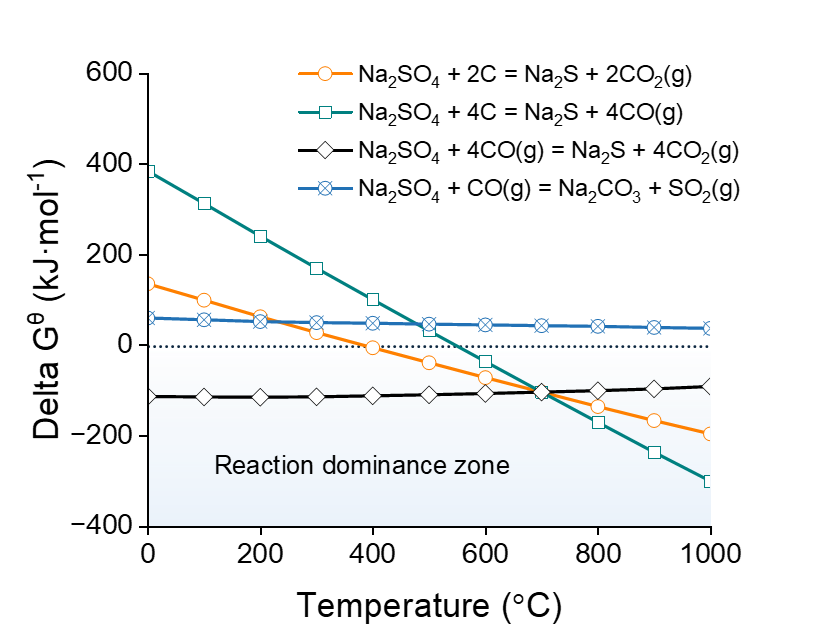
**

**Fig. S8.** The standard Gibbs free energy (∆Gθ) plotted against temperature for carbothermal deoxygenation reactions of Na2SO4 (date source: HSC Chemistry 9.0).

As the temperature increases, the formation reaction of Na2S shifts in the negative direction, simultaneously producing CO2 or CO. On the other hand, the reaction where Na2SO4 and CO simultaneously produce sodium carbonate and release SO2 cannot occur, as there is no thermodynamic driving force for this process. Therefore, the deoxygenation of Na2SO4 to form Na2S is fully feasible within the temperature range of 600-800 °C.


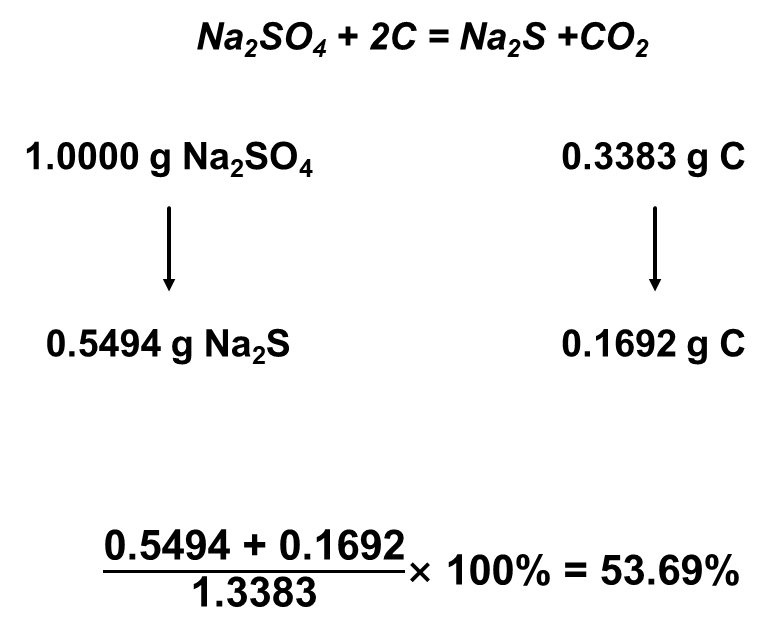


**Fig. S9.** Theoretical mass percentage of Na2SO4 thermal deoxygenation.


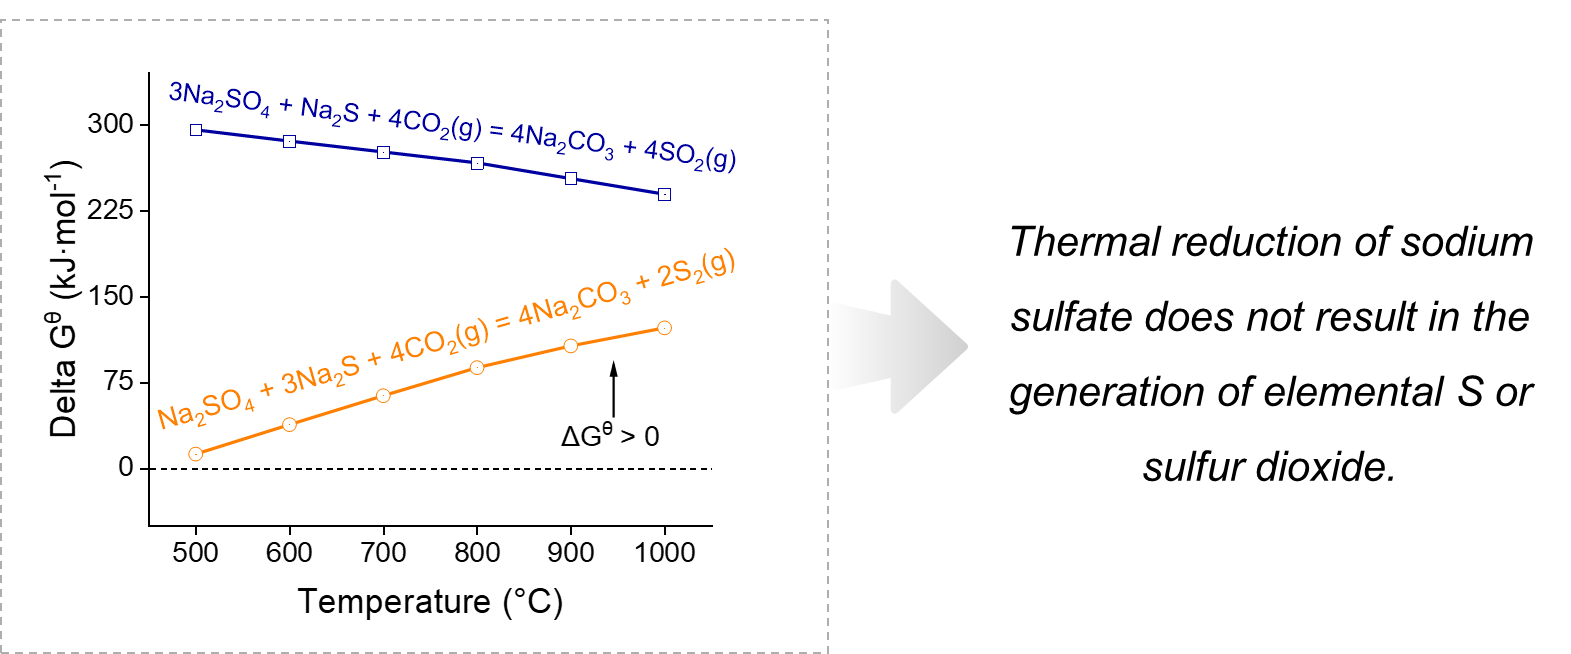


**Fig. S10.** The standard Gibbs free energy (∆Gθ) plotted against temperature for the release of S2 or SO2 from Na2SO4-Na2S mixture.


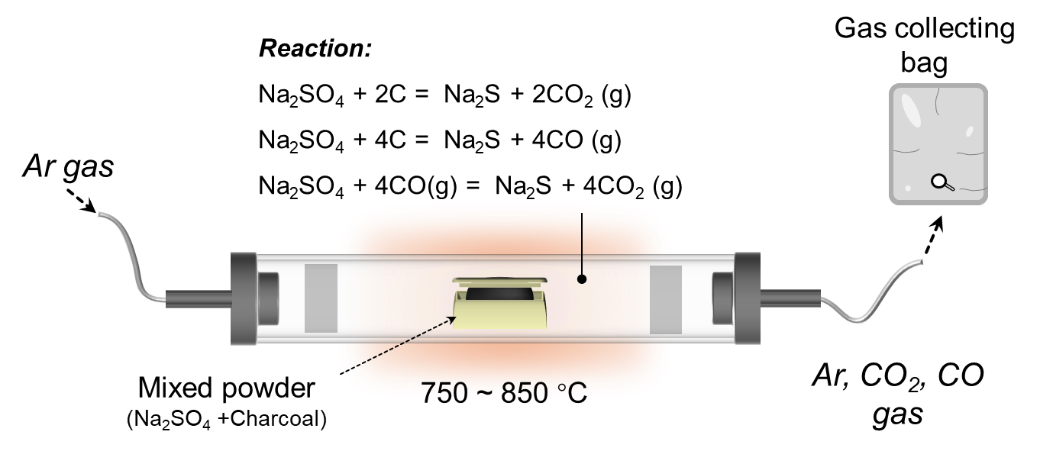


**Fig. S11.** Schematic diagram of the device for thermal deoxygenation of Na2SO4.


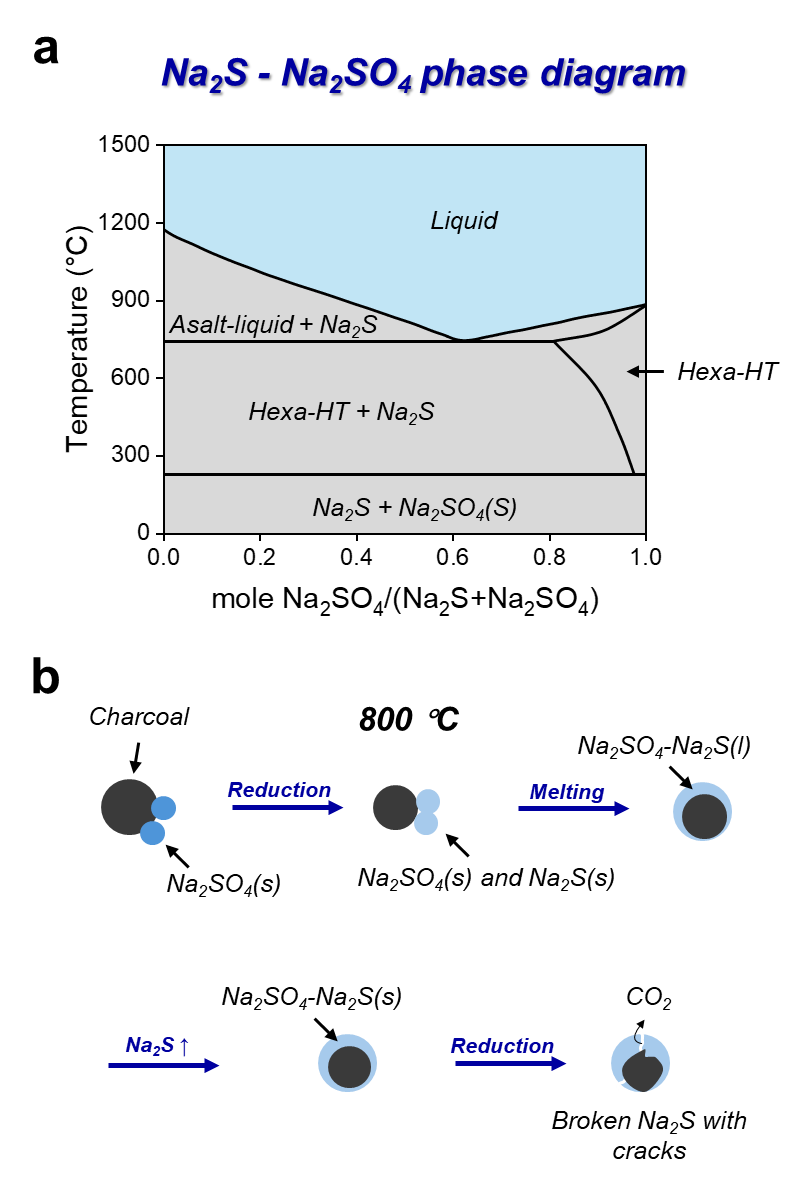


**Fig. S12.** (a) Phase diagram of the molten Na2S-Na2SO4 mixture. (b) Schematic diagram of the thermochemical deoxygenation process of Na2SO4.


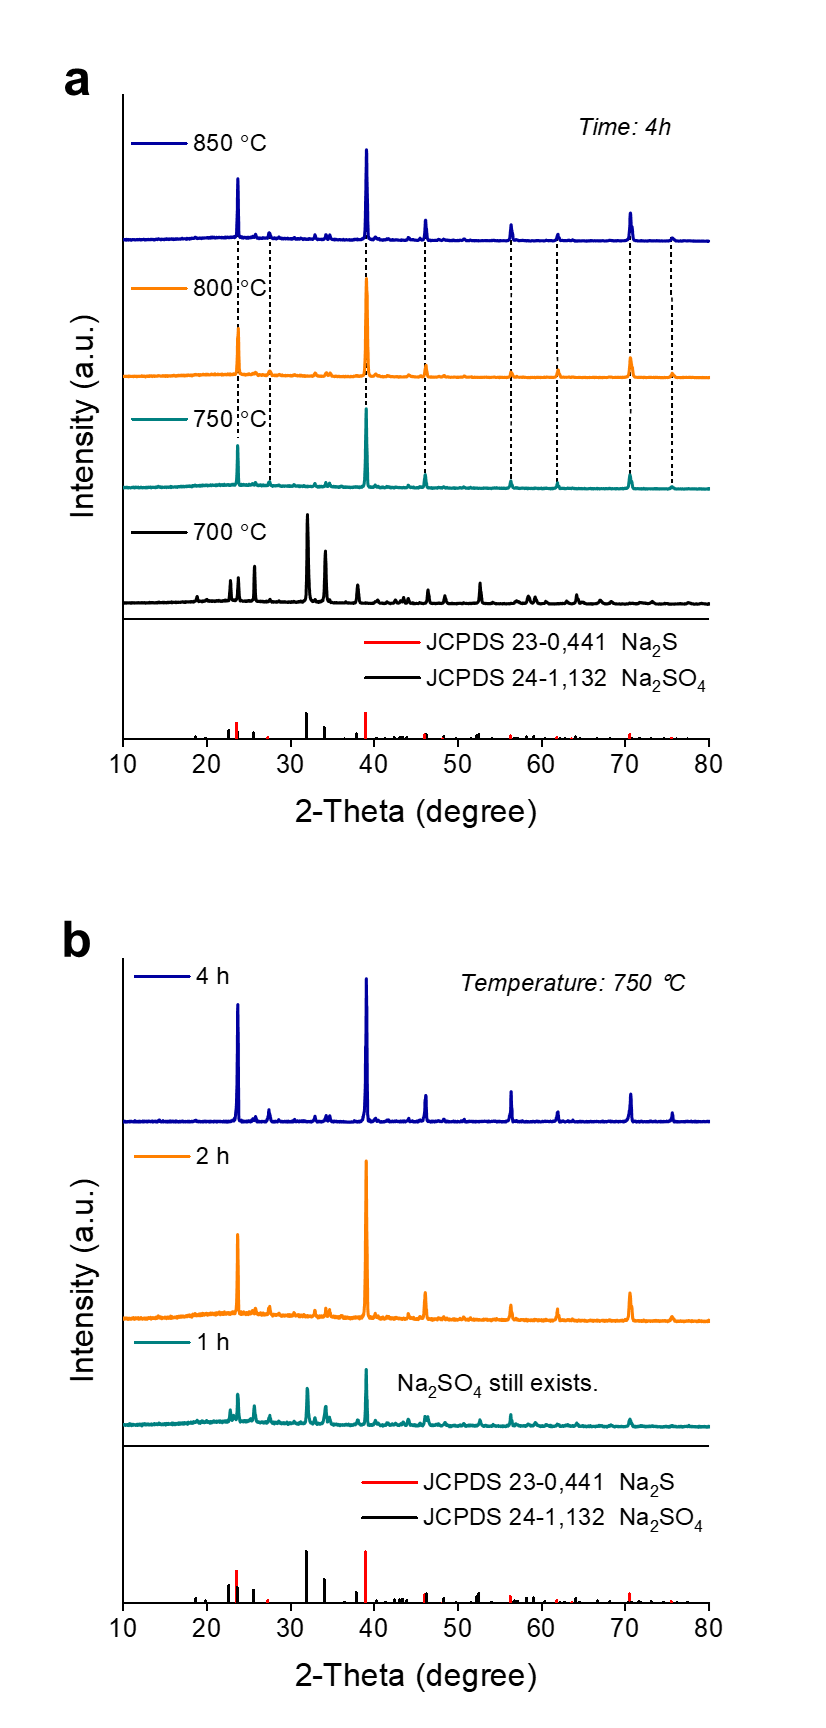


**Fig. S13.** XRD patterns of the products after thermochemical deoxygenation at (a) different temperatures (4 h) and (b) 750 °C for different times.


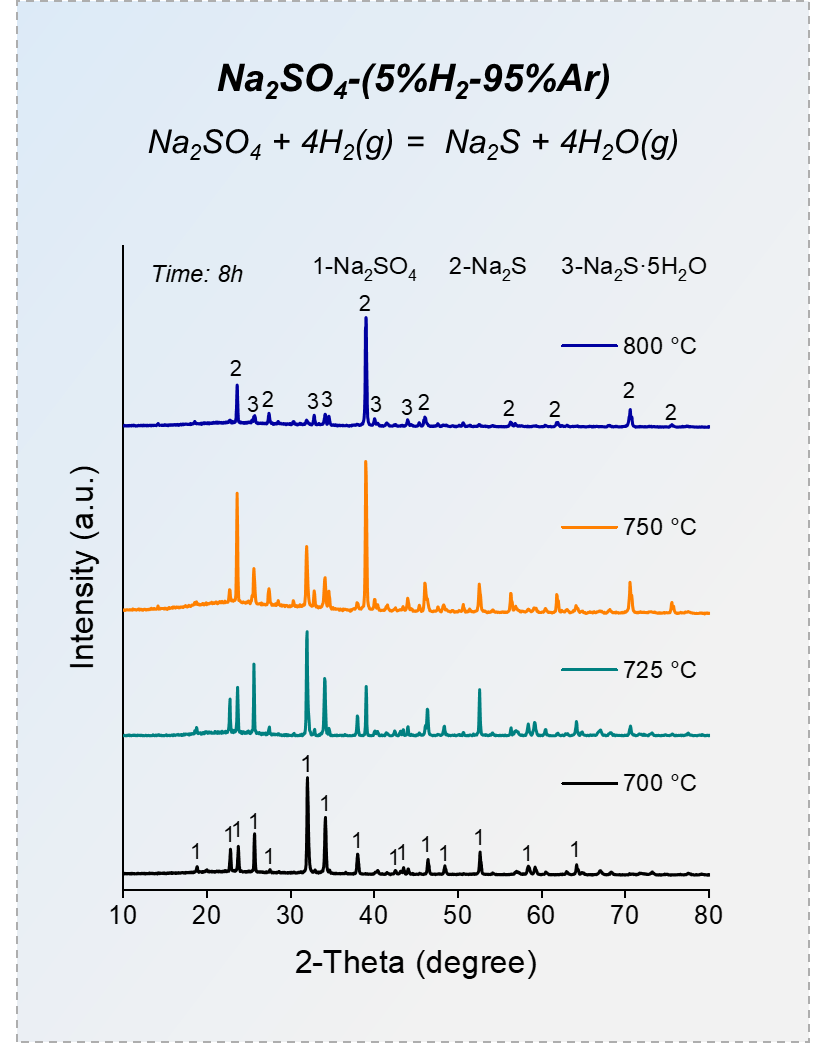


**Fig. S14.** XRD patterns of sodium sulfate by hydrogen thermochemical reduction as a function of temperature (isothermal time: 8 h).


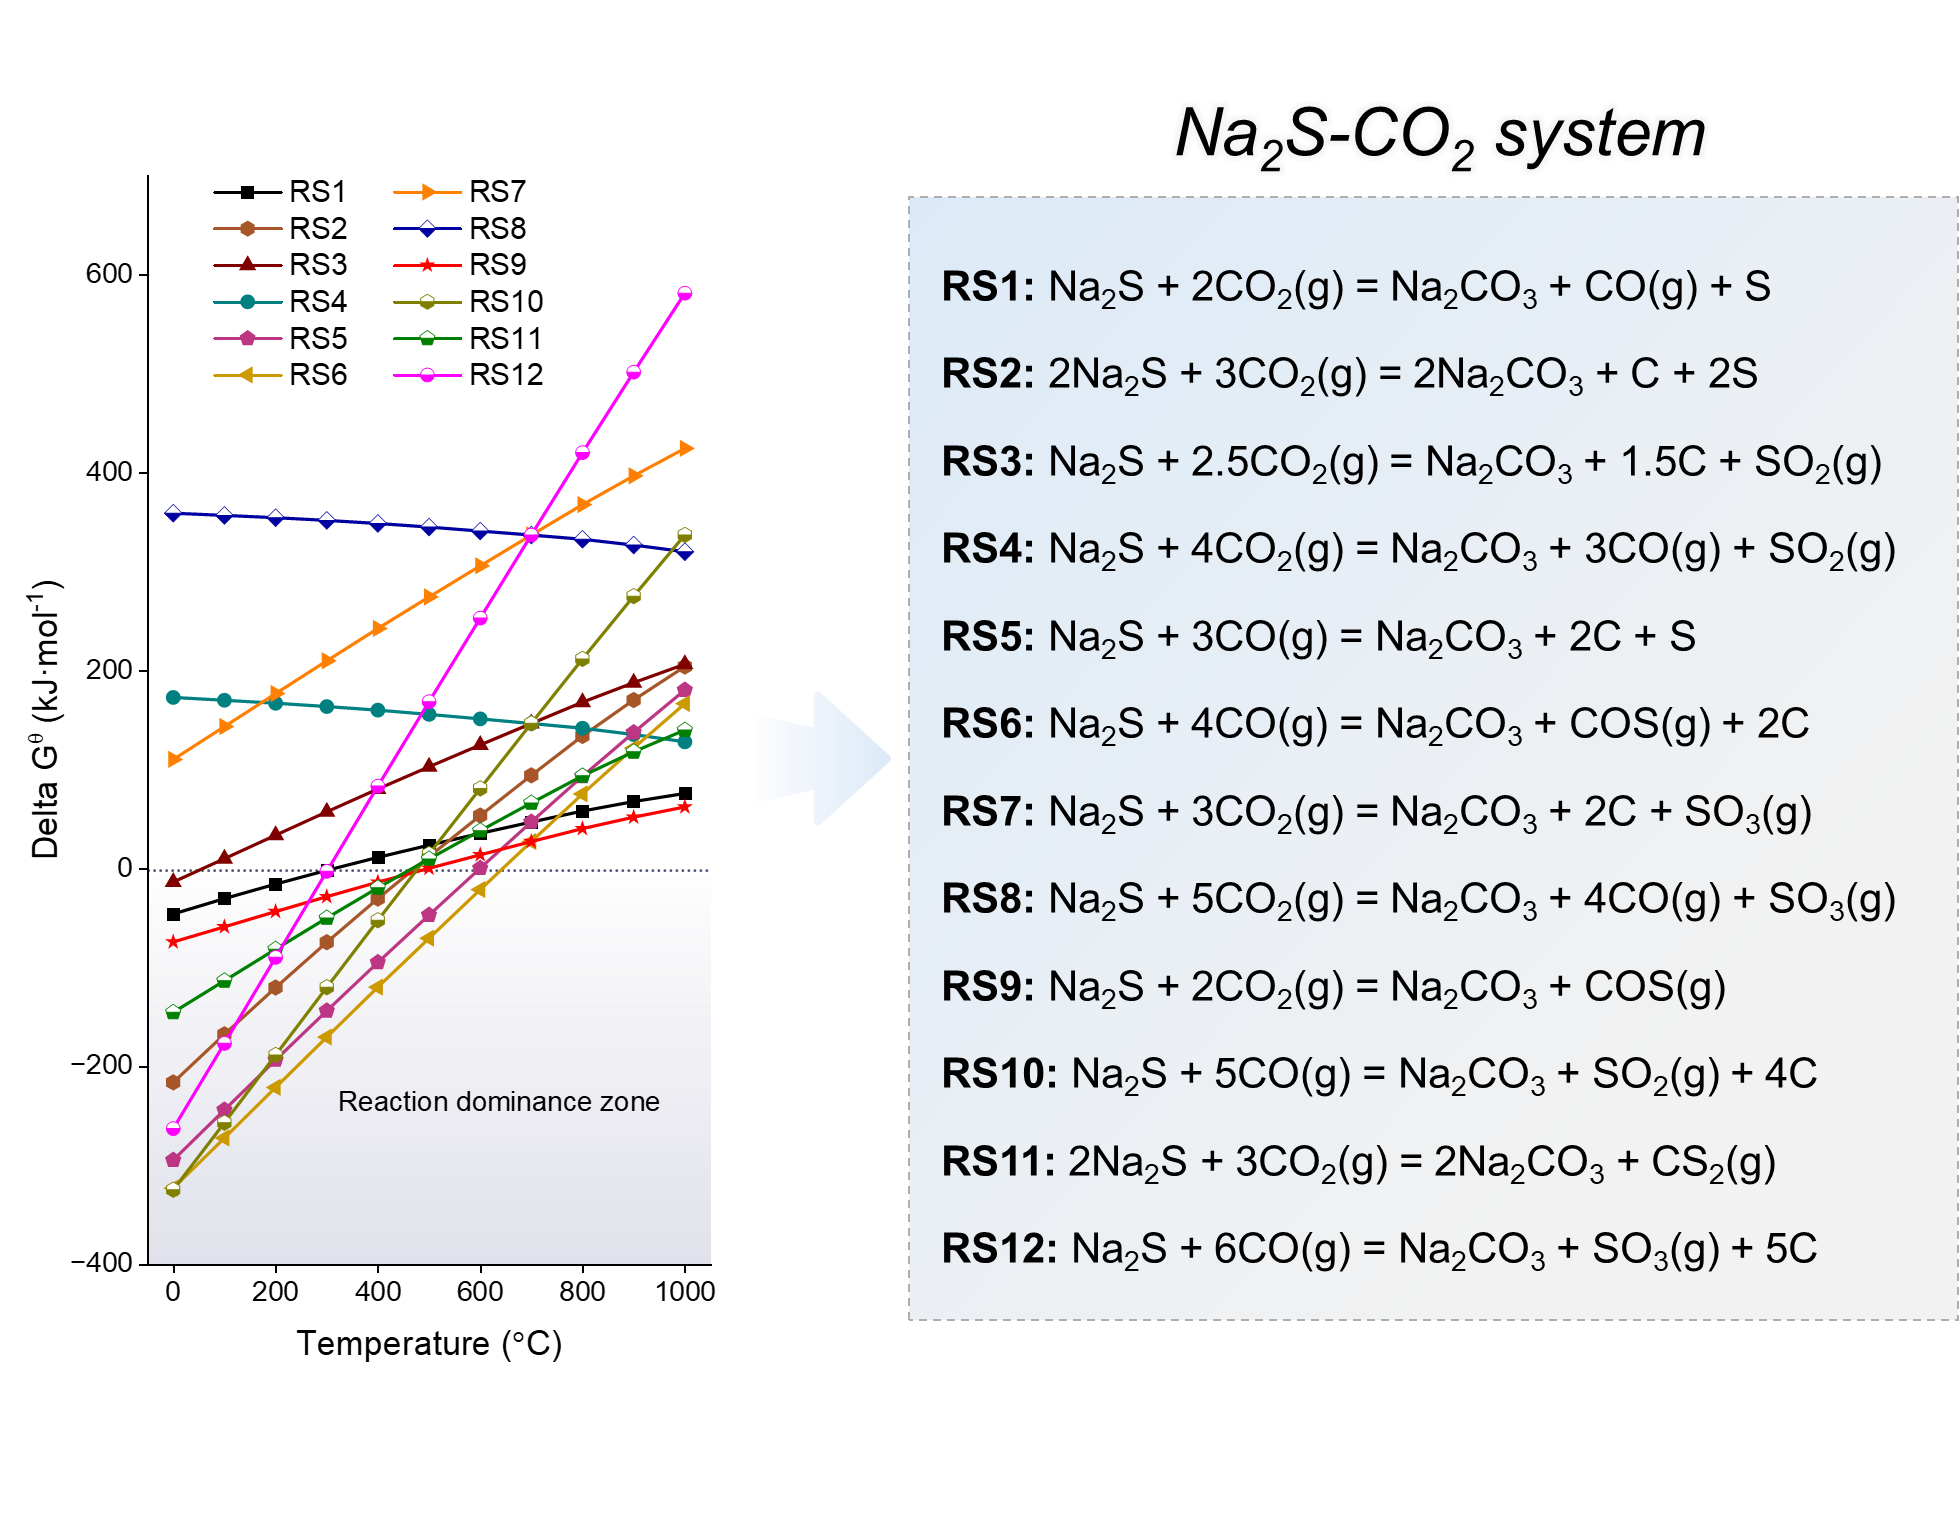


**Fig. S15.** The standard Gibbs free energy (∆Gθ) plotted against temperature for the carbonation of Na2S in a CO2 atmosphere (date source: HSC Chemistry 9.0).


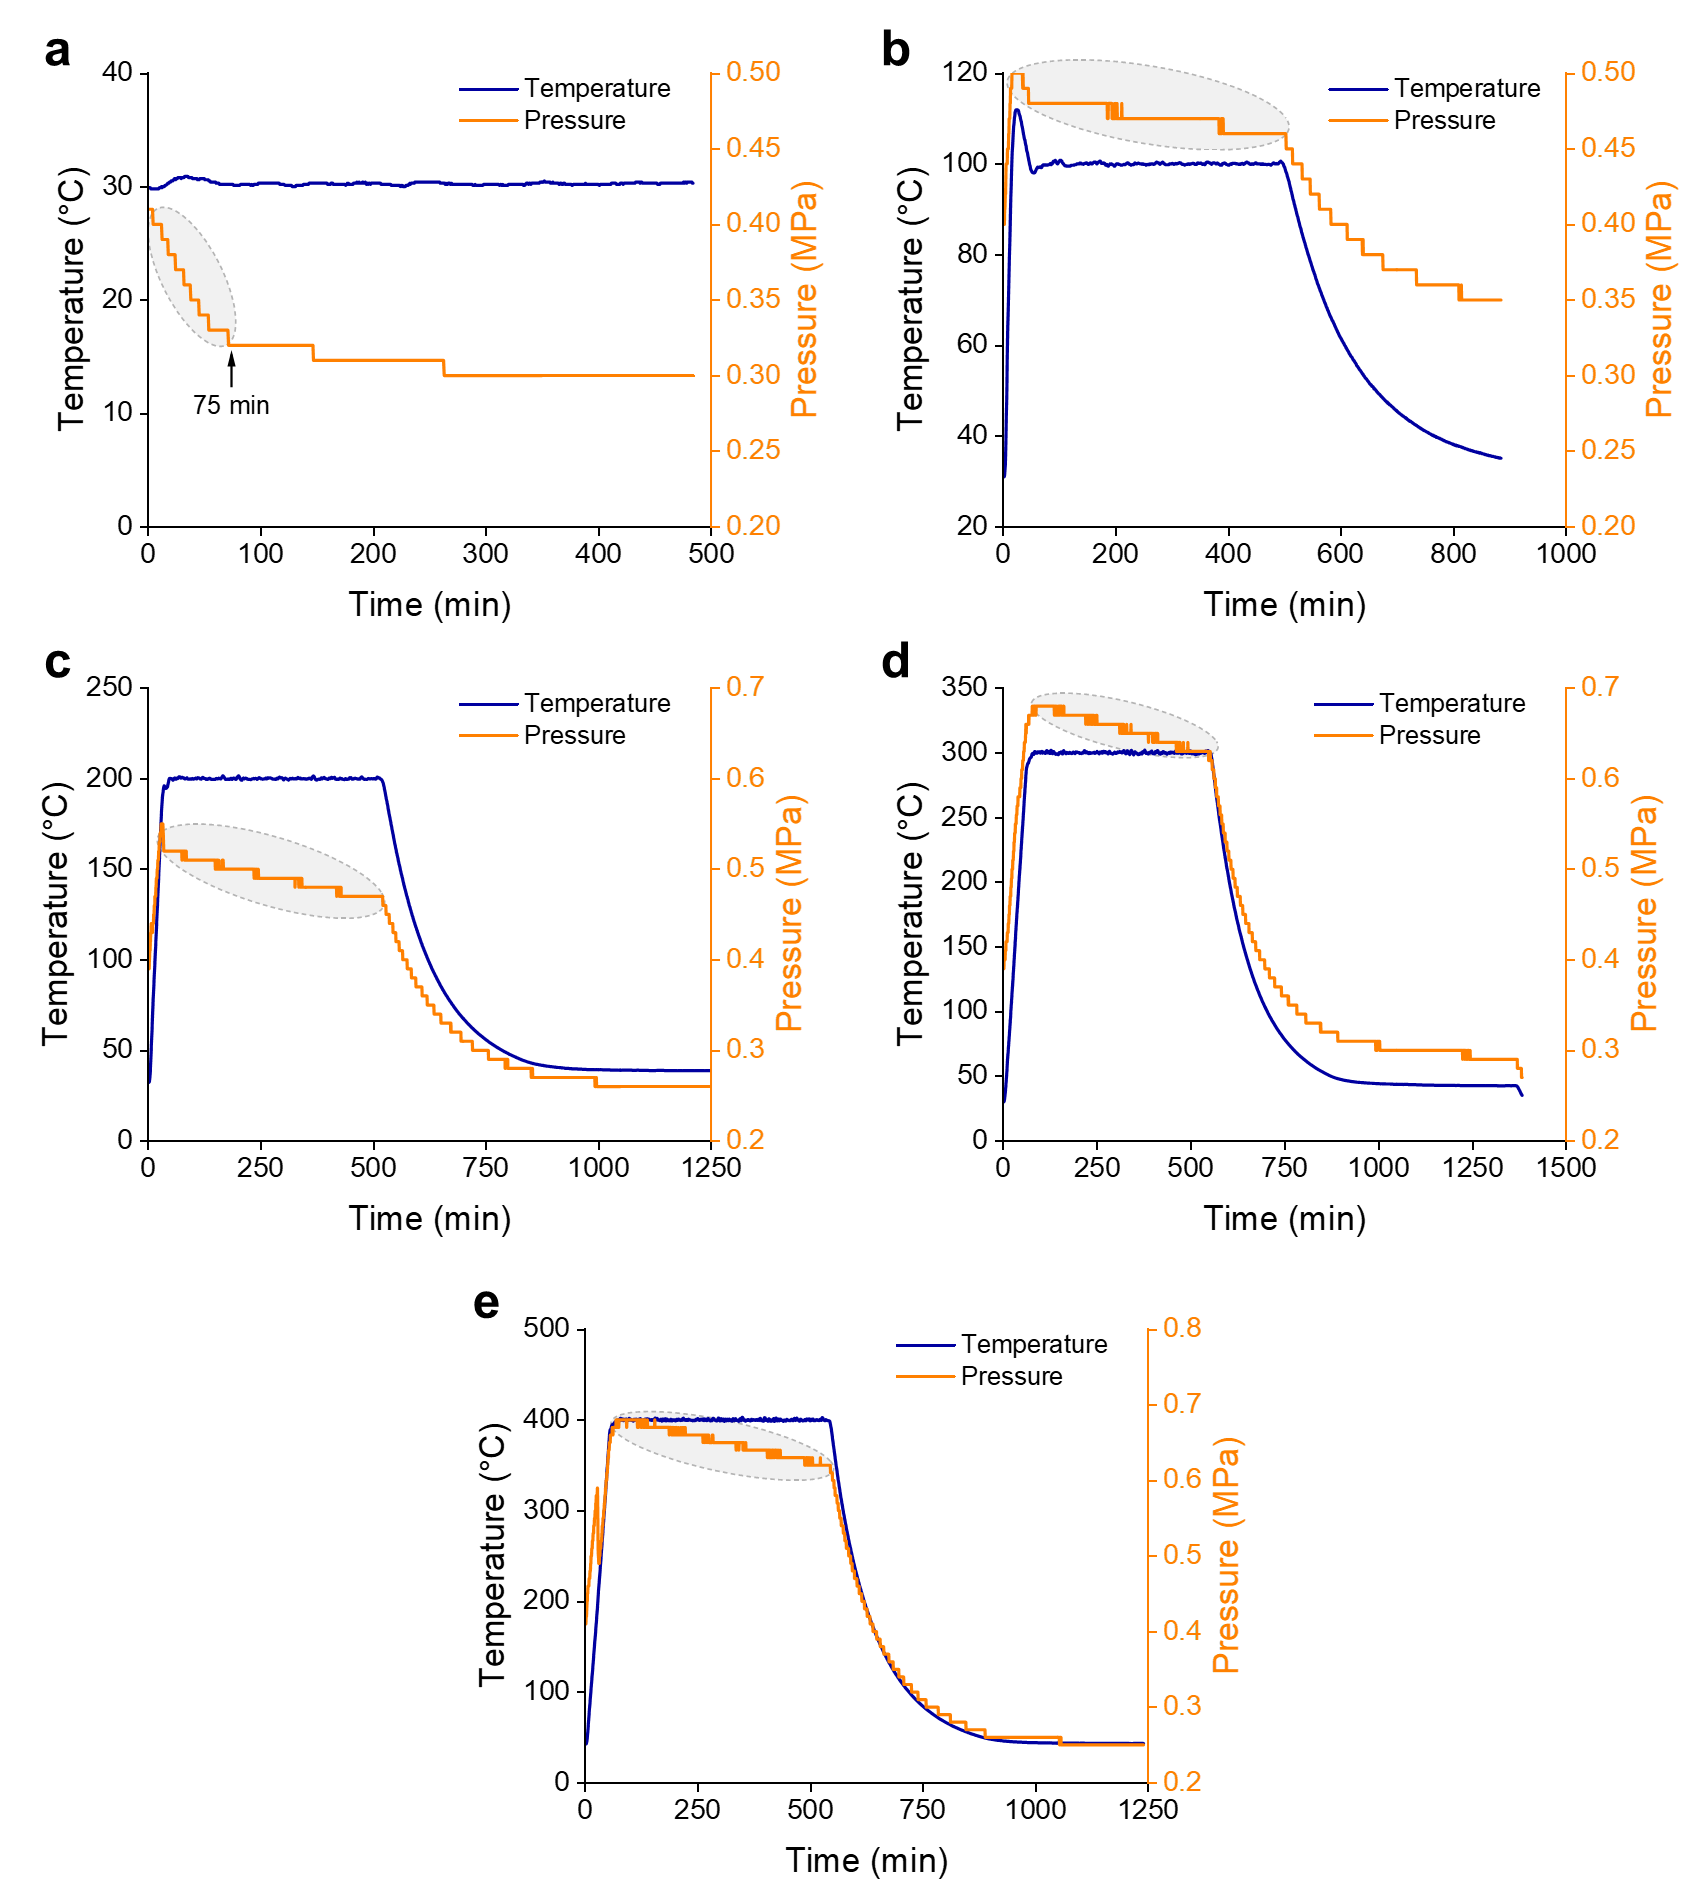


**Fig. S16.** The temperature and pressure curves in a closed steel reactor as a function of time: (a) room temperature, (b) 100 °C, (c) 200 °C, (d) 300 °C, and (e) 400 °C.


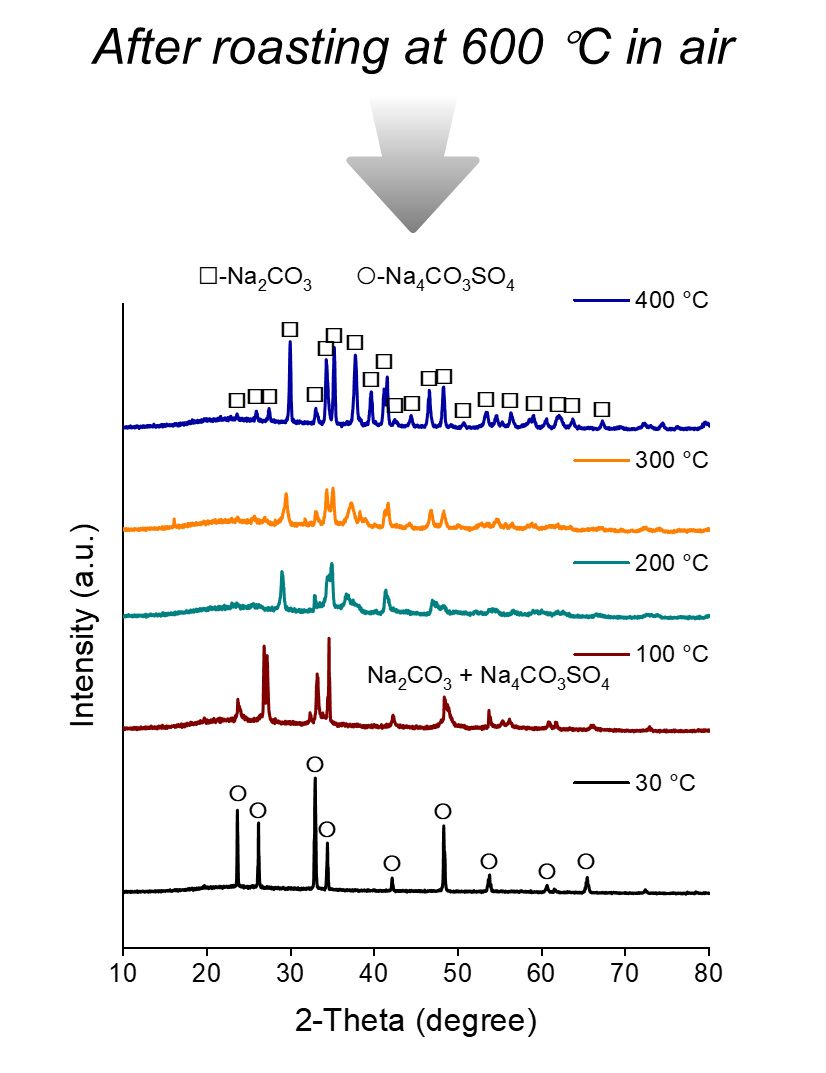


**Fig. S17.** XRD patterns of solid reaction products at different temperatures in the closed steel reactor after further 600 °C roasting in air.


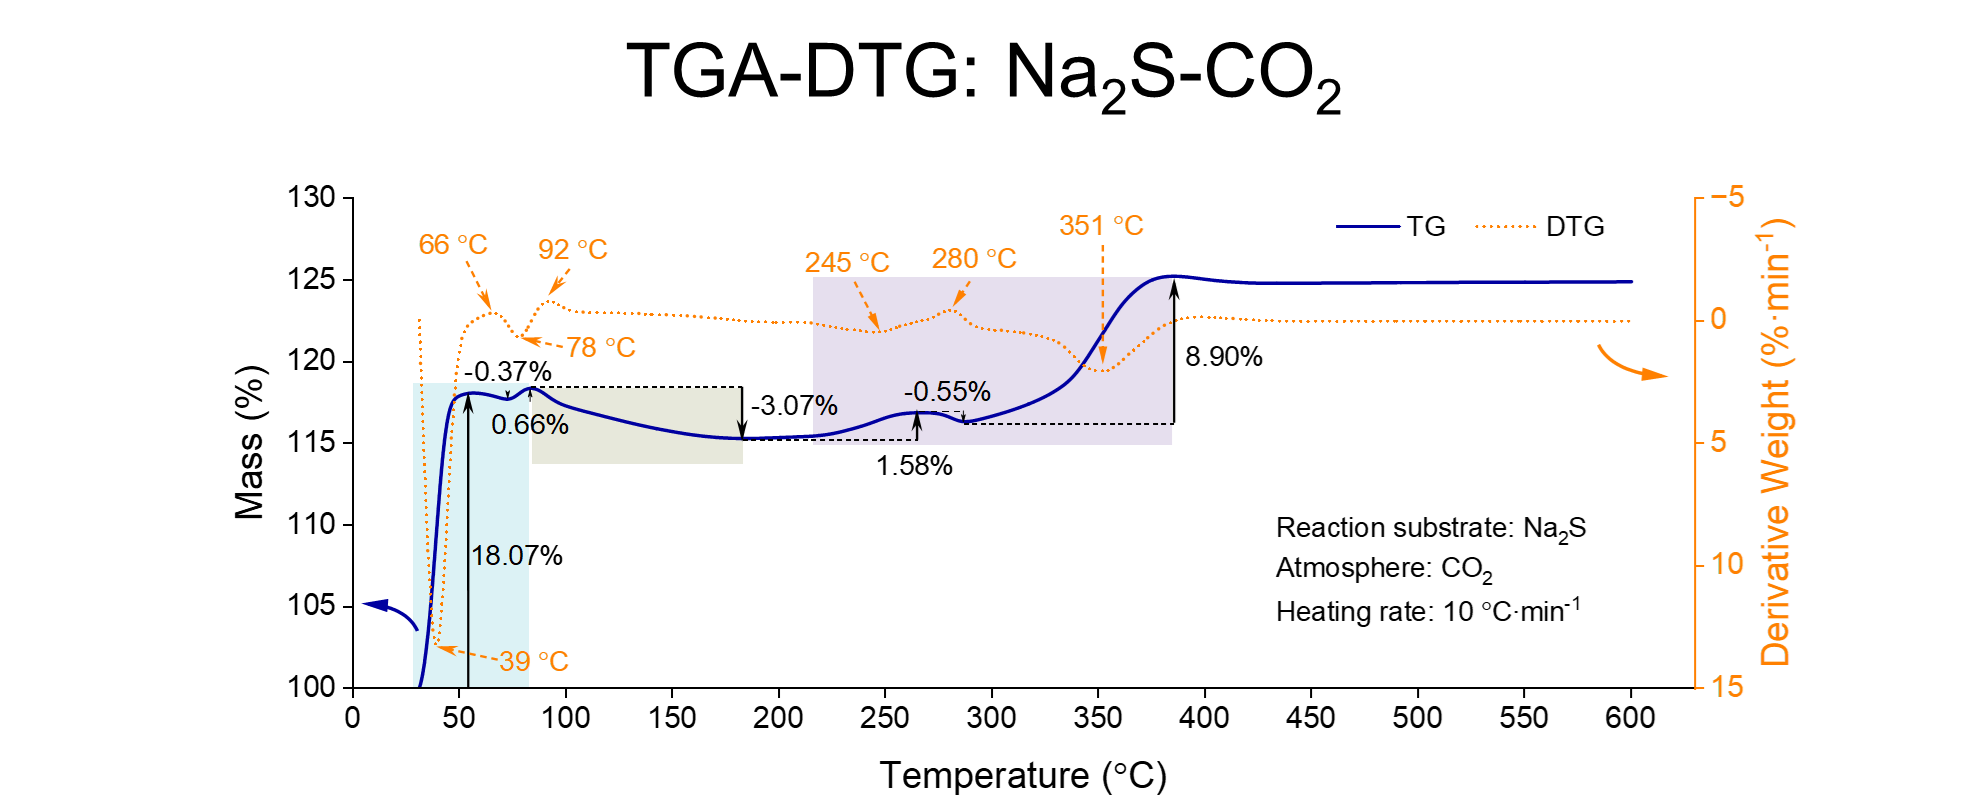


**Fig. S18.** TGA-DTG curves of the mixture of Na2S and charcoal (i.e. deoxygenation product of waste Na2SO4) (heating rate: 10 °C·min-1, atmosphere: CO2).


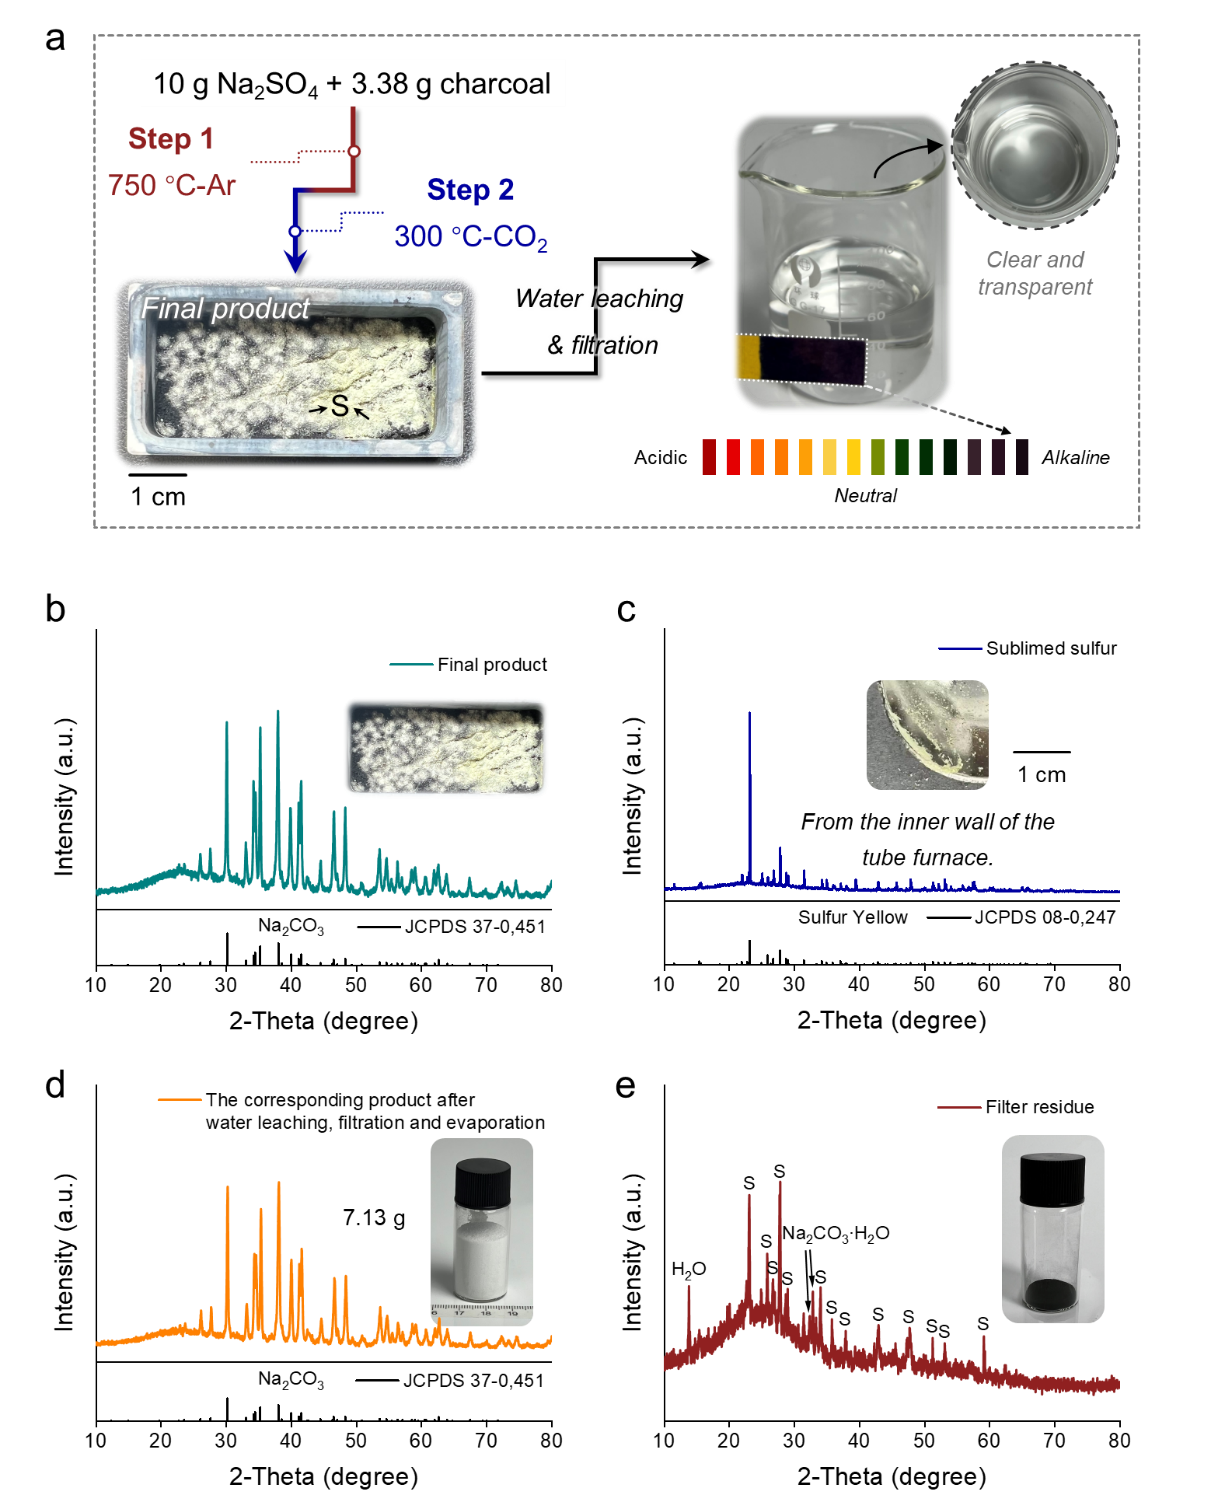


**Fig. S19.** (a) The conversion of Na2SO4 to Na2CO3 in a reactor with continuous gas (Ar and CO2) flow. XRD patterns of (b) the product after the reaction, (c) the sublimed sulfur collected from the inner wall of the tube furnace, (d) Na2CO3 product after water leaching, filtration, and evaporation, and (e) filter residue.


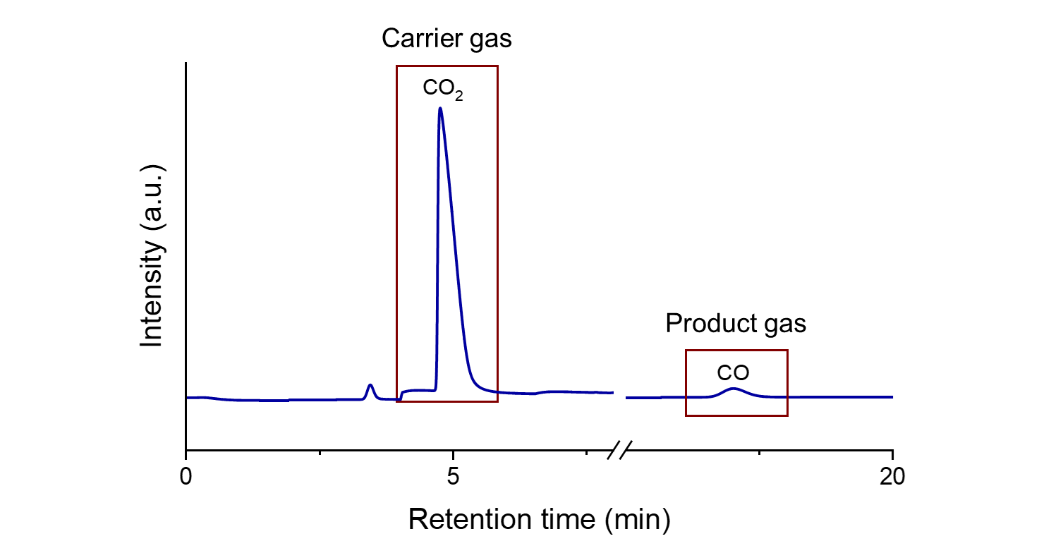


**Fig. S20.** Gas chromatogram for identifying product gases after switching to CO2 gas for 20 min in a continuous flow reactor.


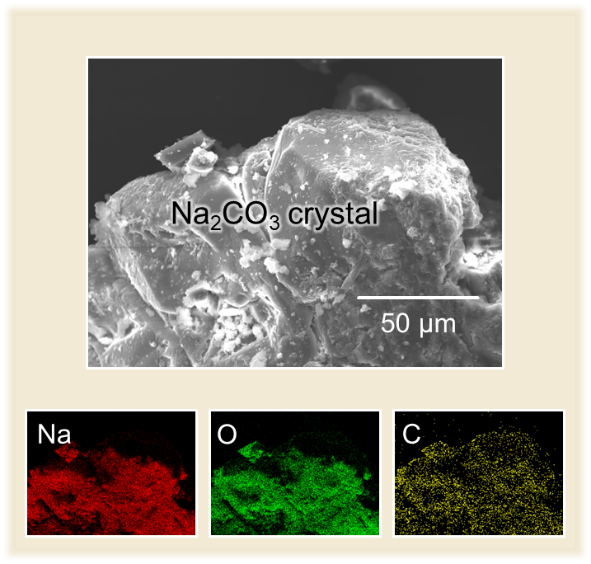


**Fig. S21.** Mapping images of Na, O, and C for the Na2CO3 crystal product.


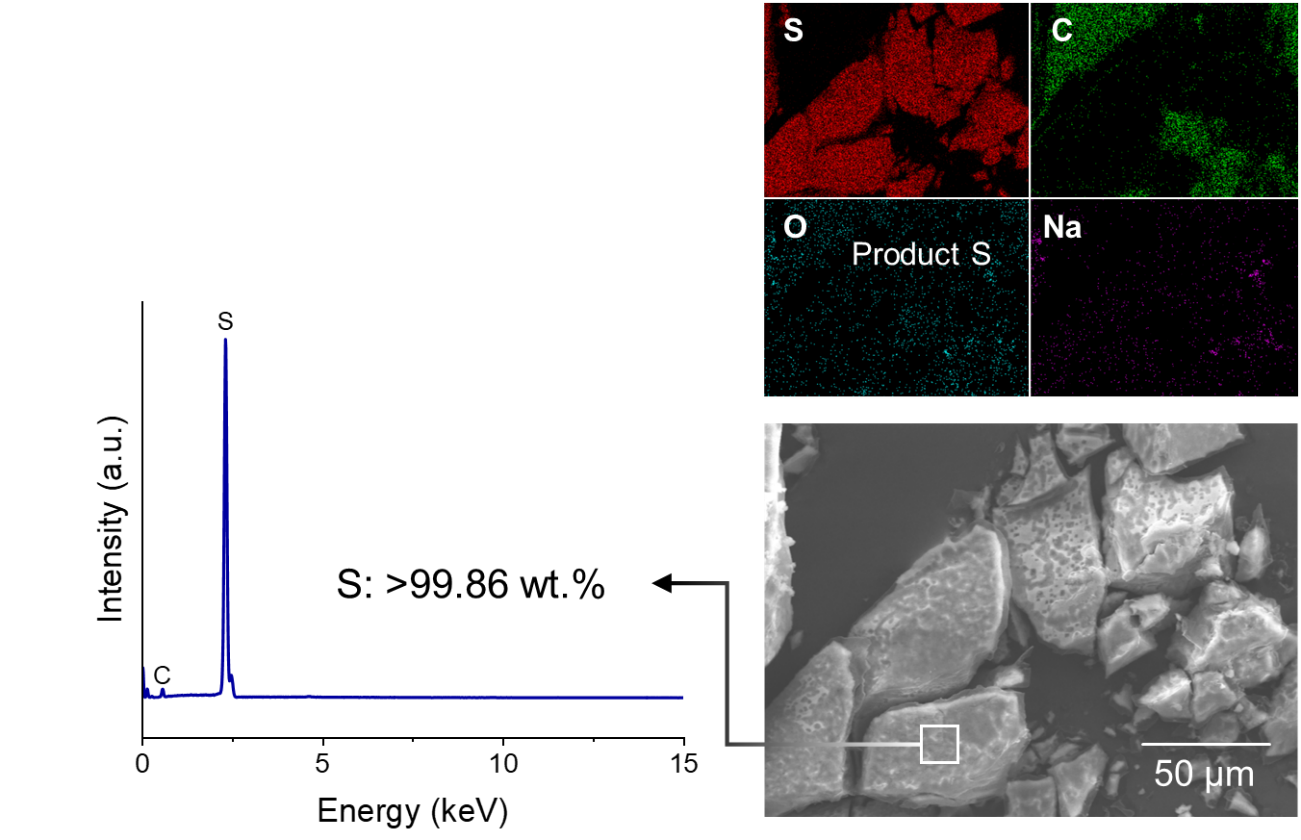


**Fig. S22.** Mapping images and EDS analysis of S, C, O, and Na for the sulfur product.


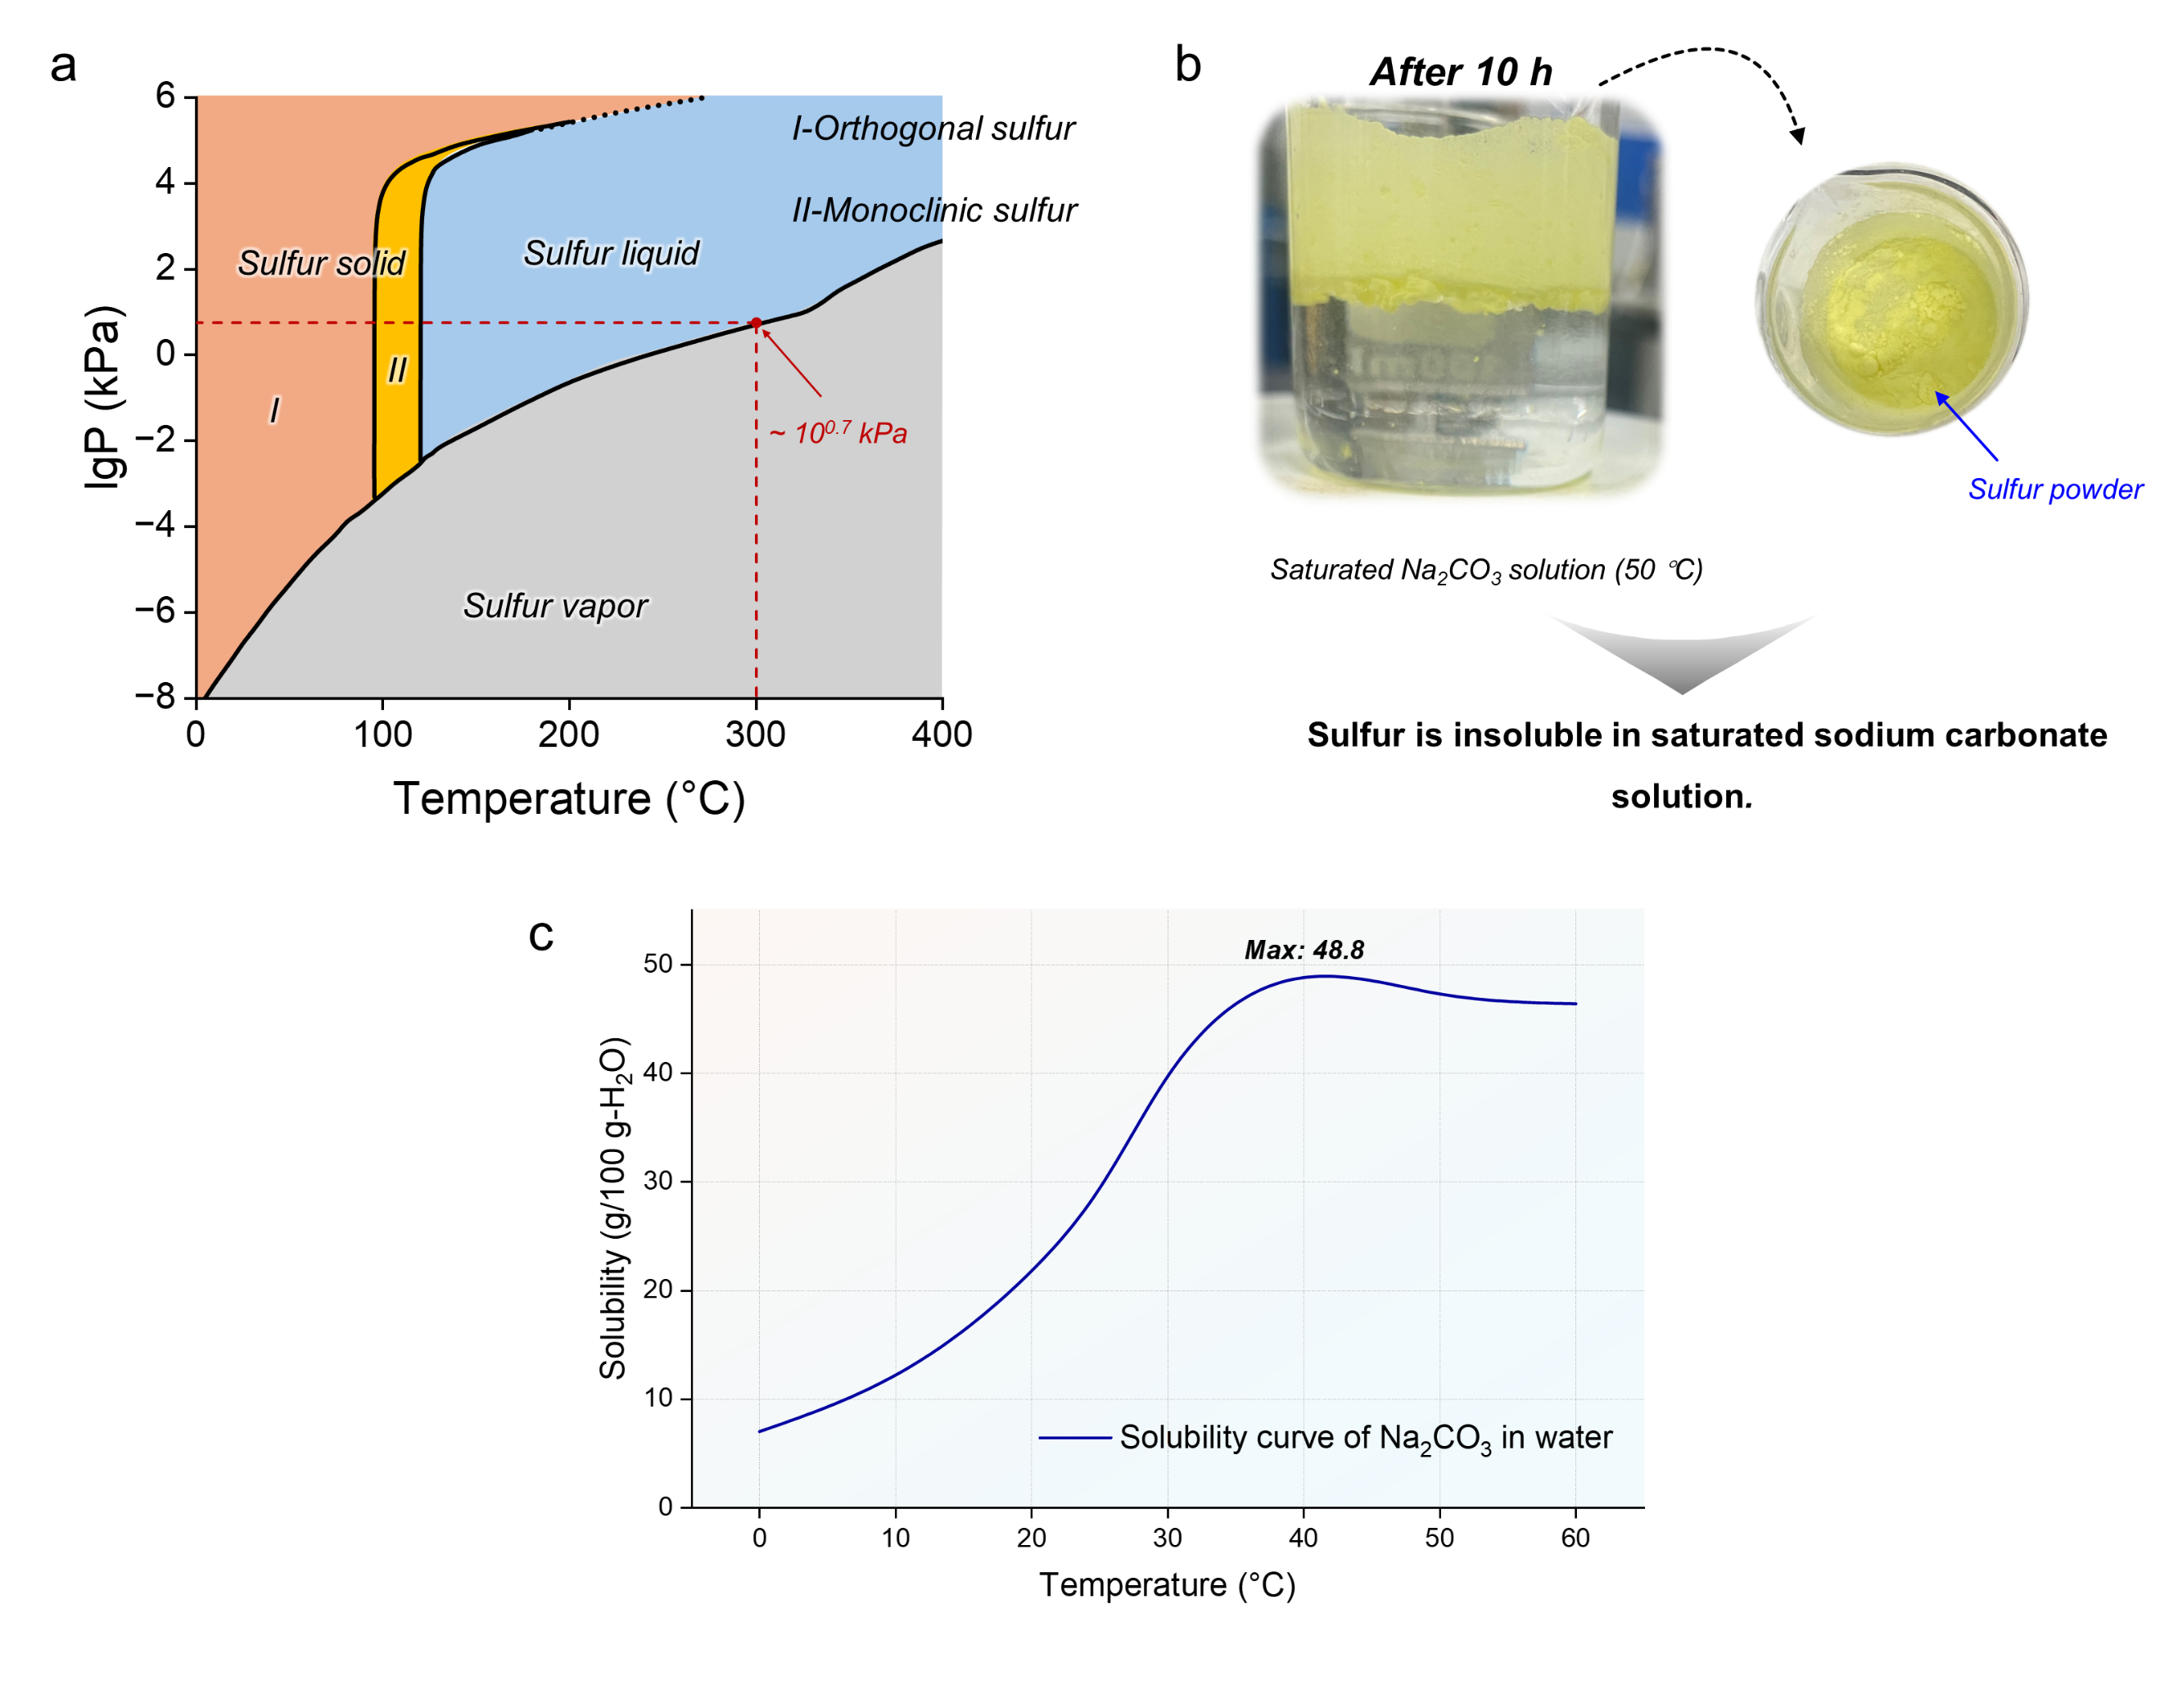


**Fig. S23.** (a) The relationship between the saturation vapor pressure of sulfur and temperature.6 (b) The state of sulfur powder dissolved in saturated Na2CO3 solution after 10 h. (c) The solubility curve of Na2CO3 in water.


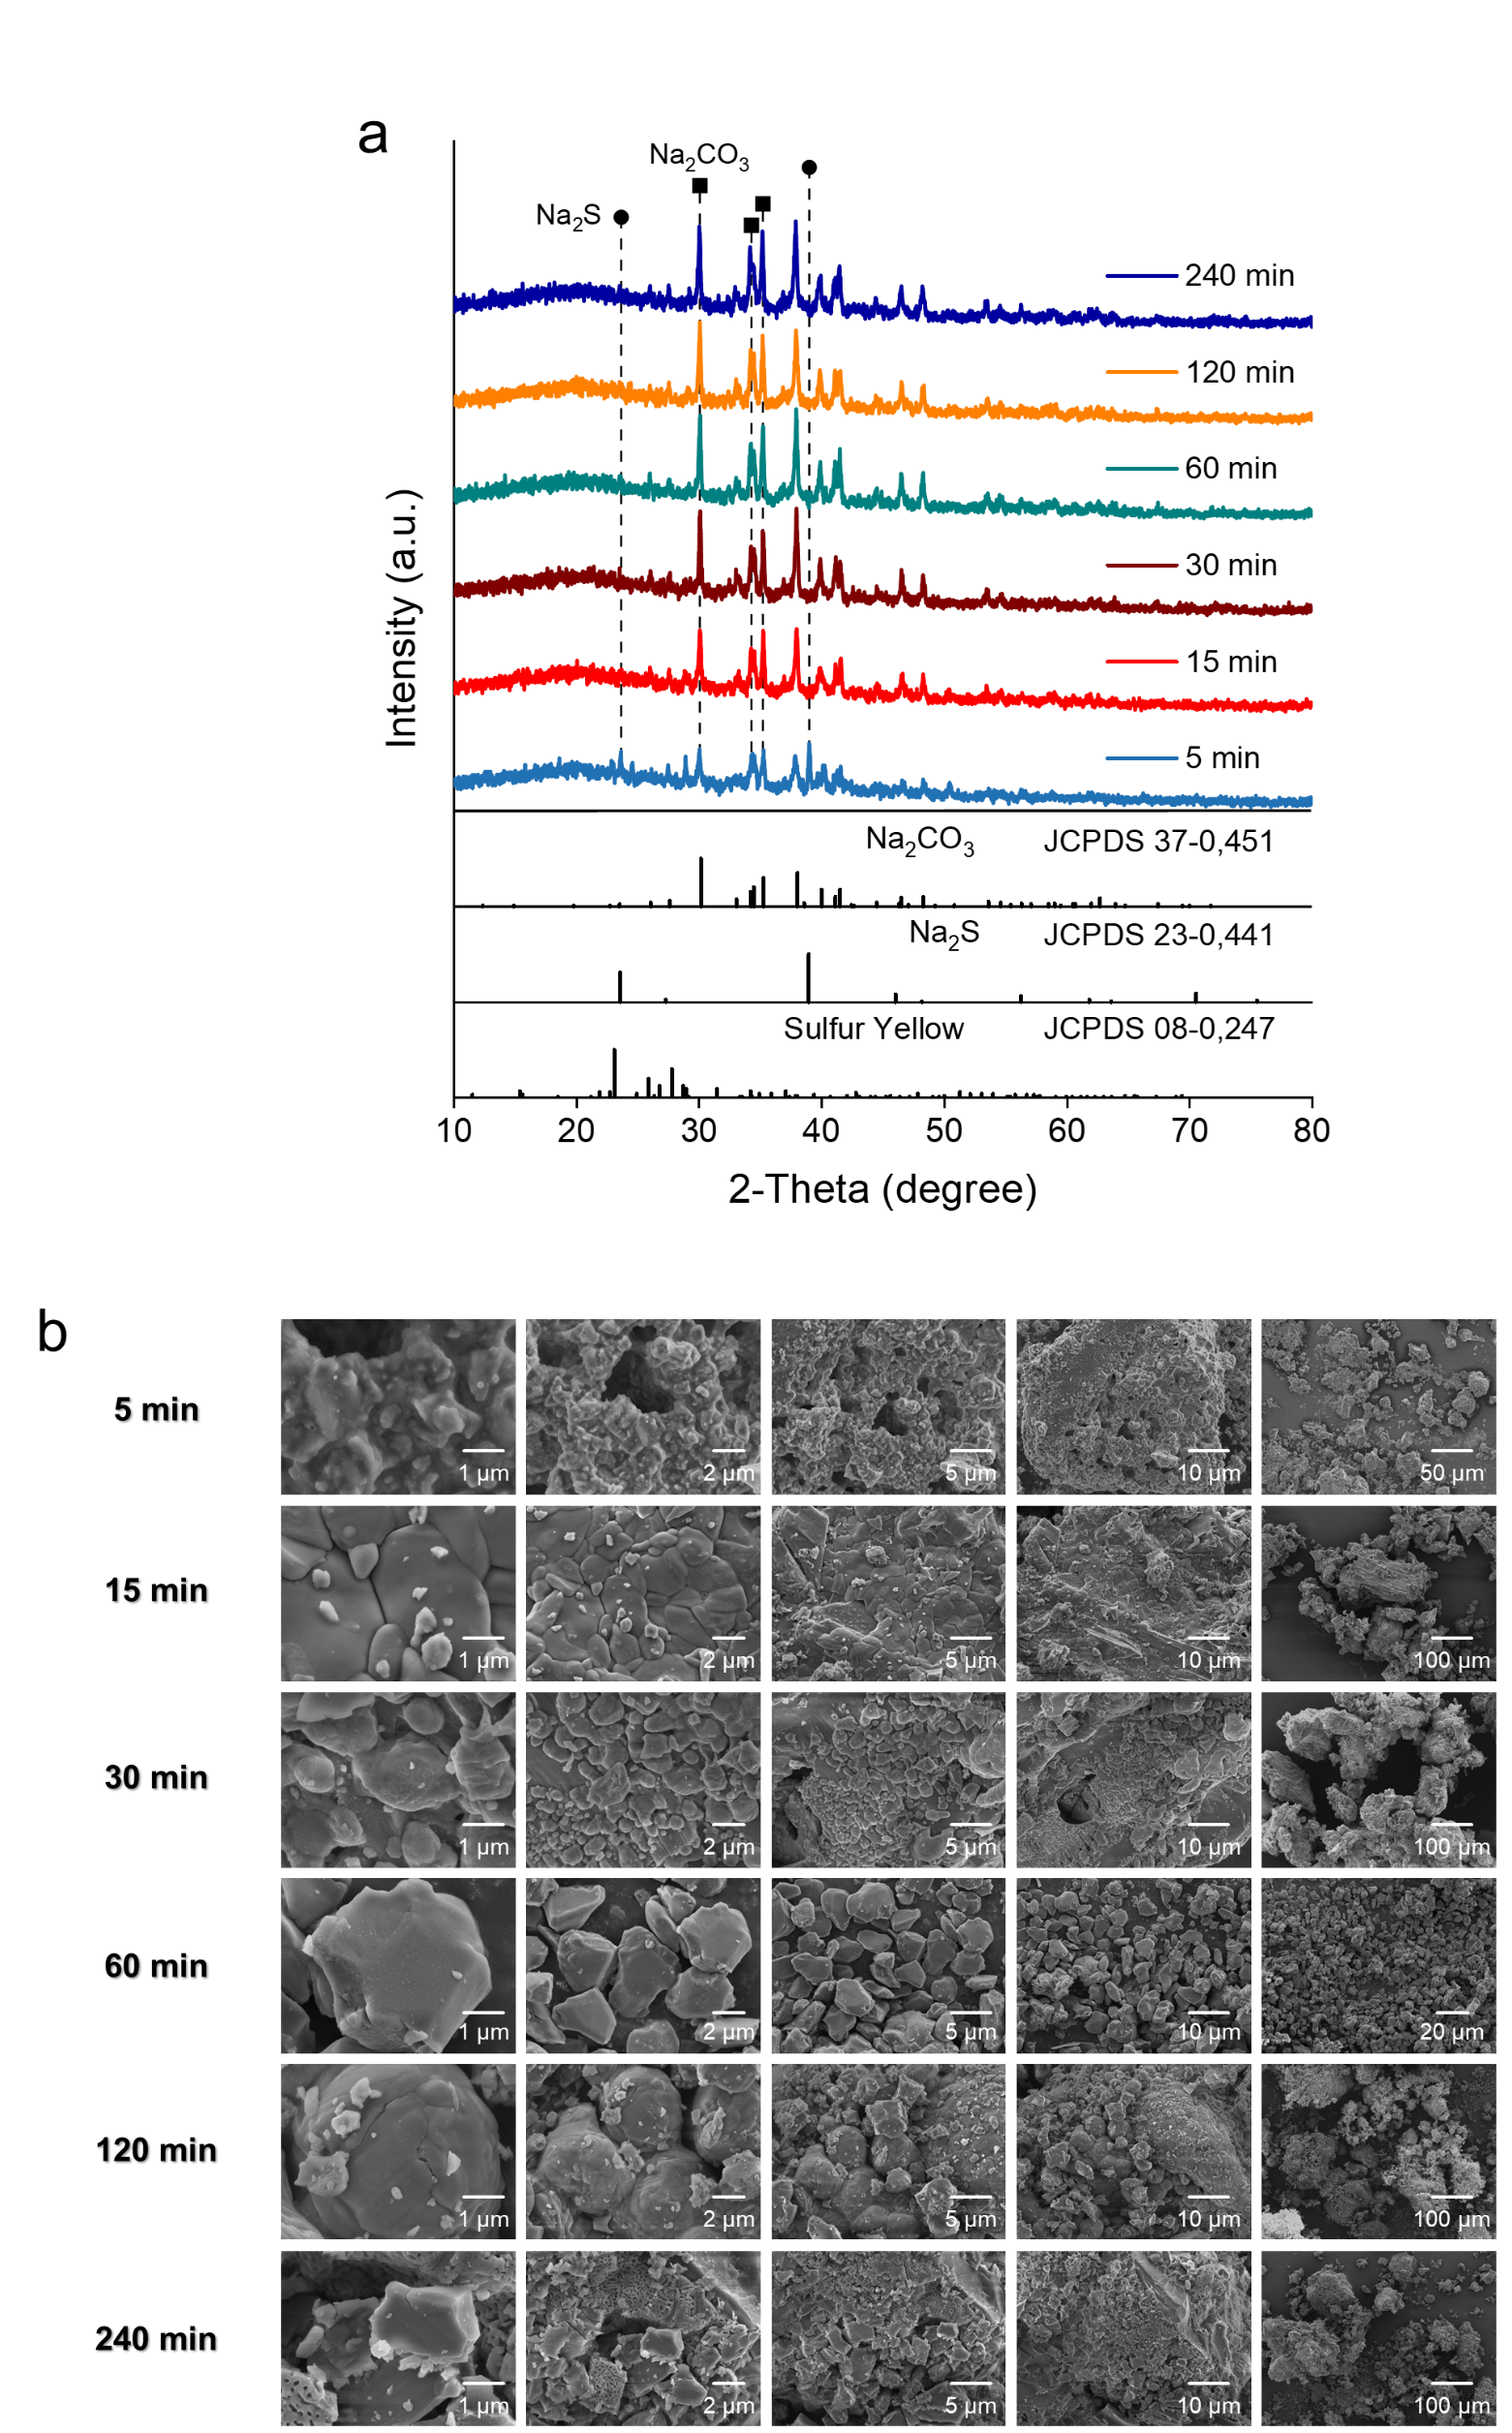


**Fig. S24.** (a) XRD patterns and (b) SEM images of Na2S under different durations of CO2 atmosphere (100 mL·min-1) at 300 °C.


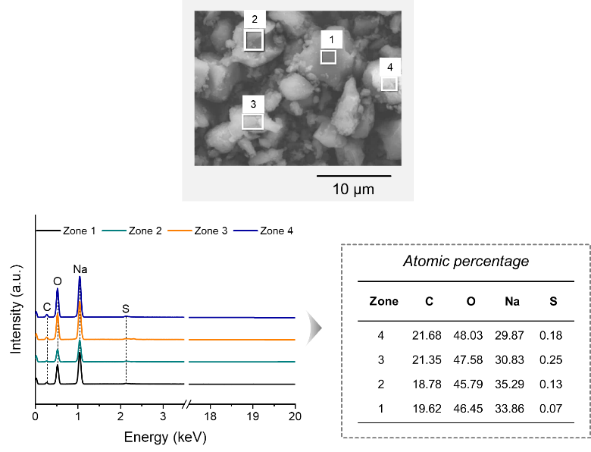


**Fig. S25.** Mapping images and EDS analysis of S, C, O, and Na for the final product in the scale-up production.


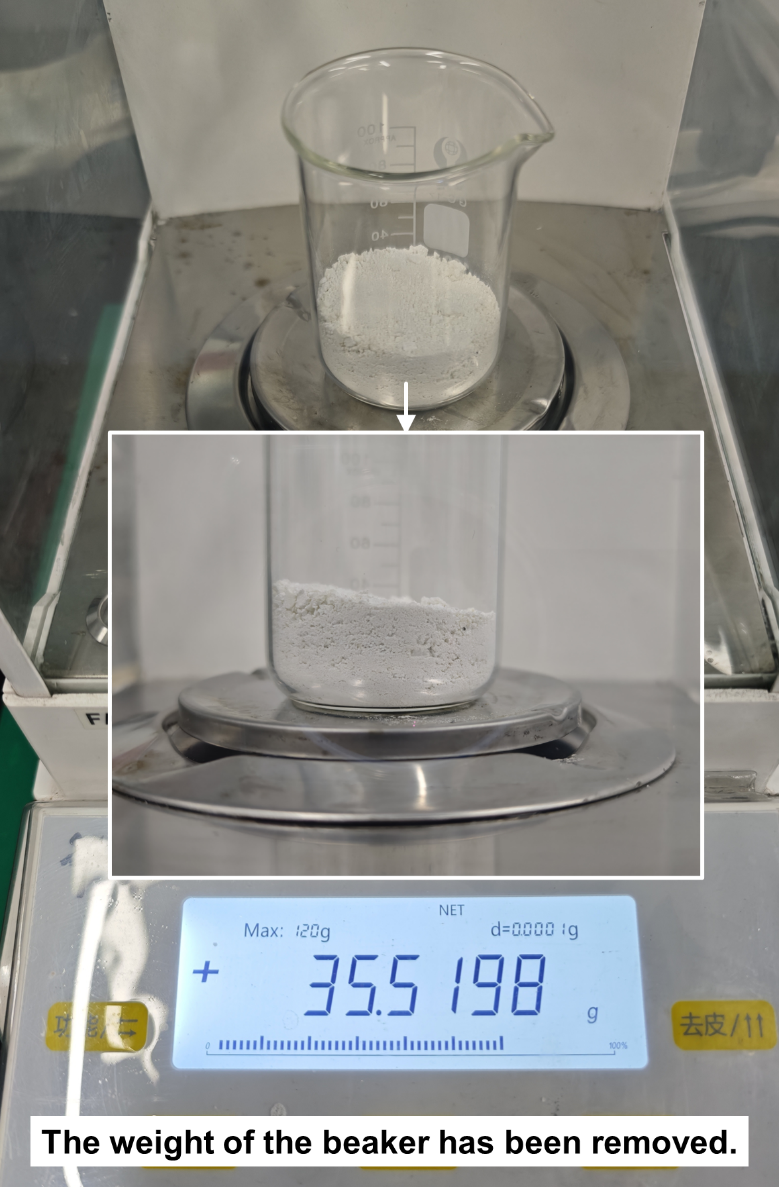


**Fig. S26.** Optical photograph of Na2CO3 upcycled from 50 g of waste Na2SO4 in this work.


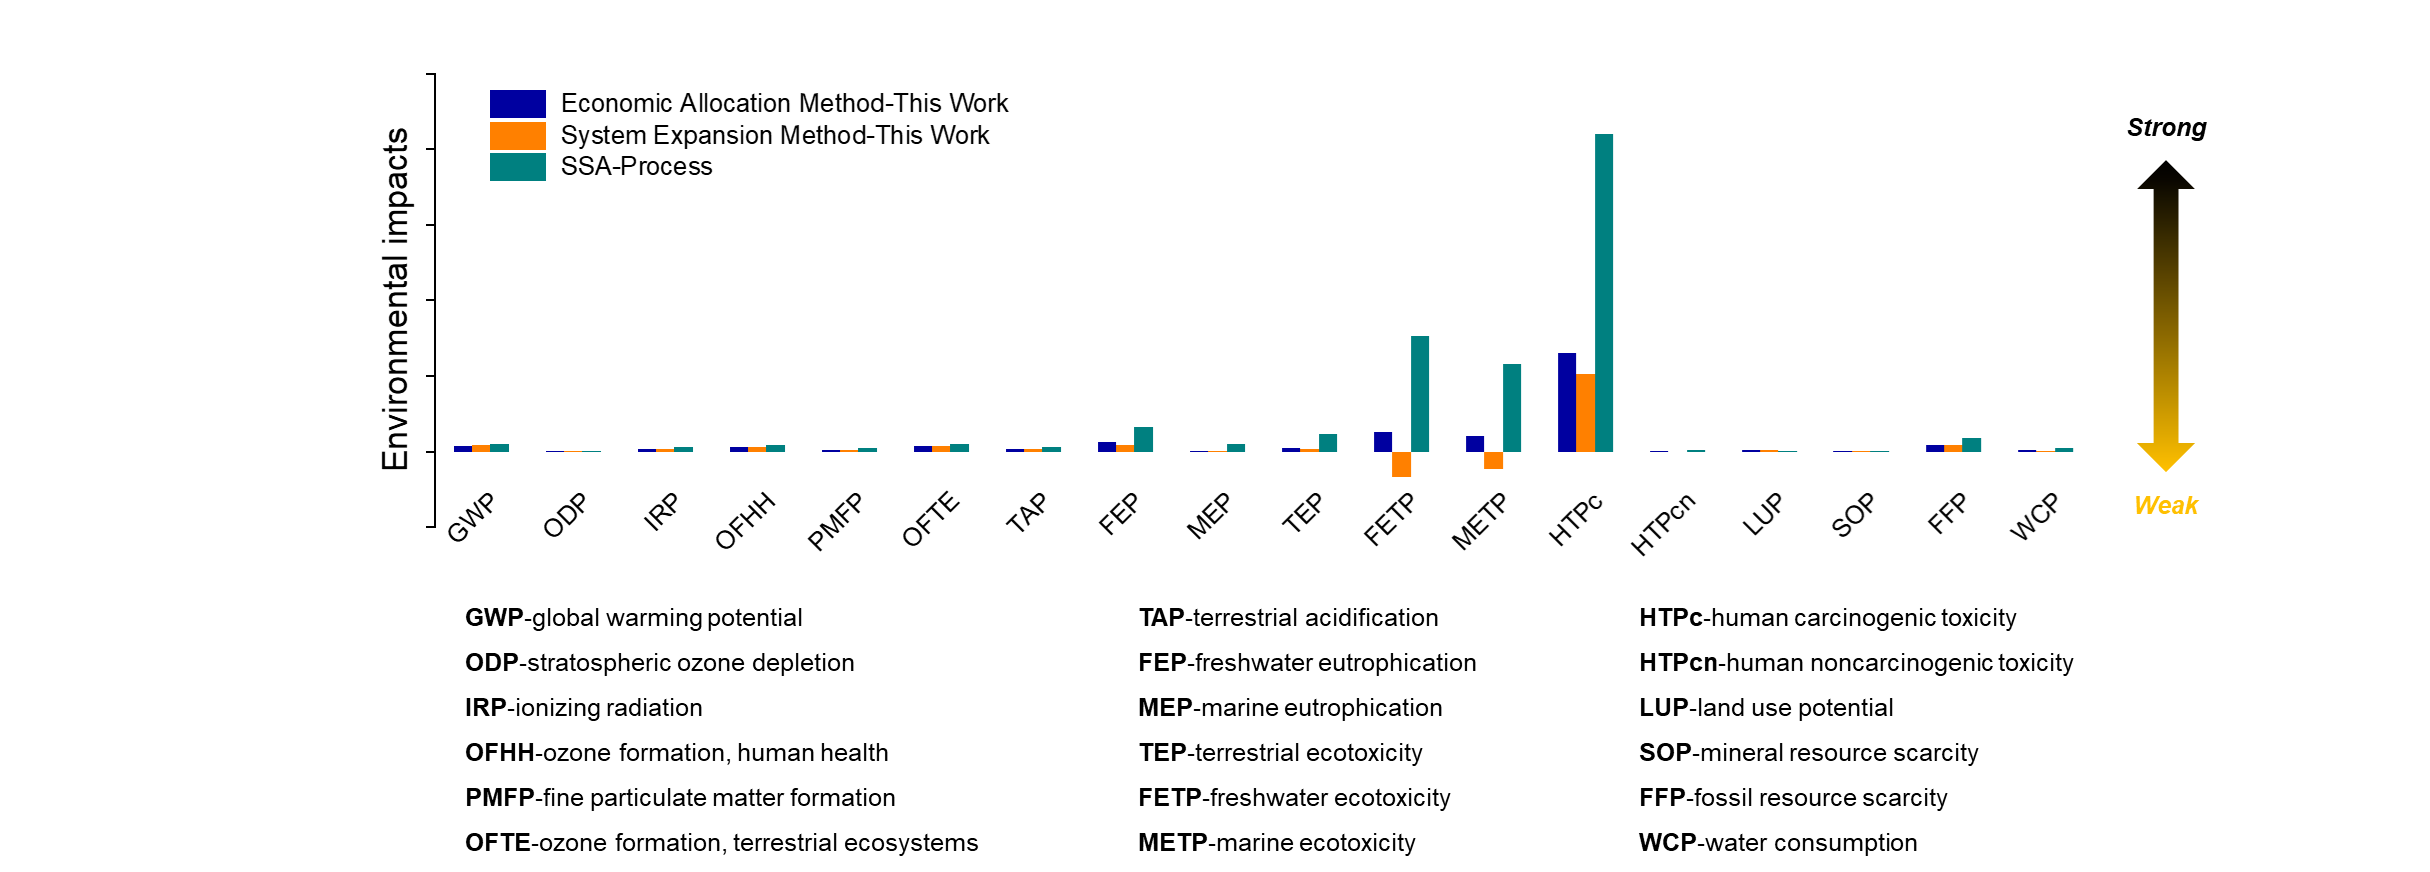


**Fig. S27.** The normalized environmental impact assessment results for SSA-Process and this work.


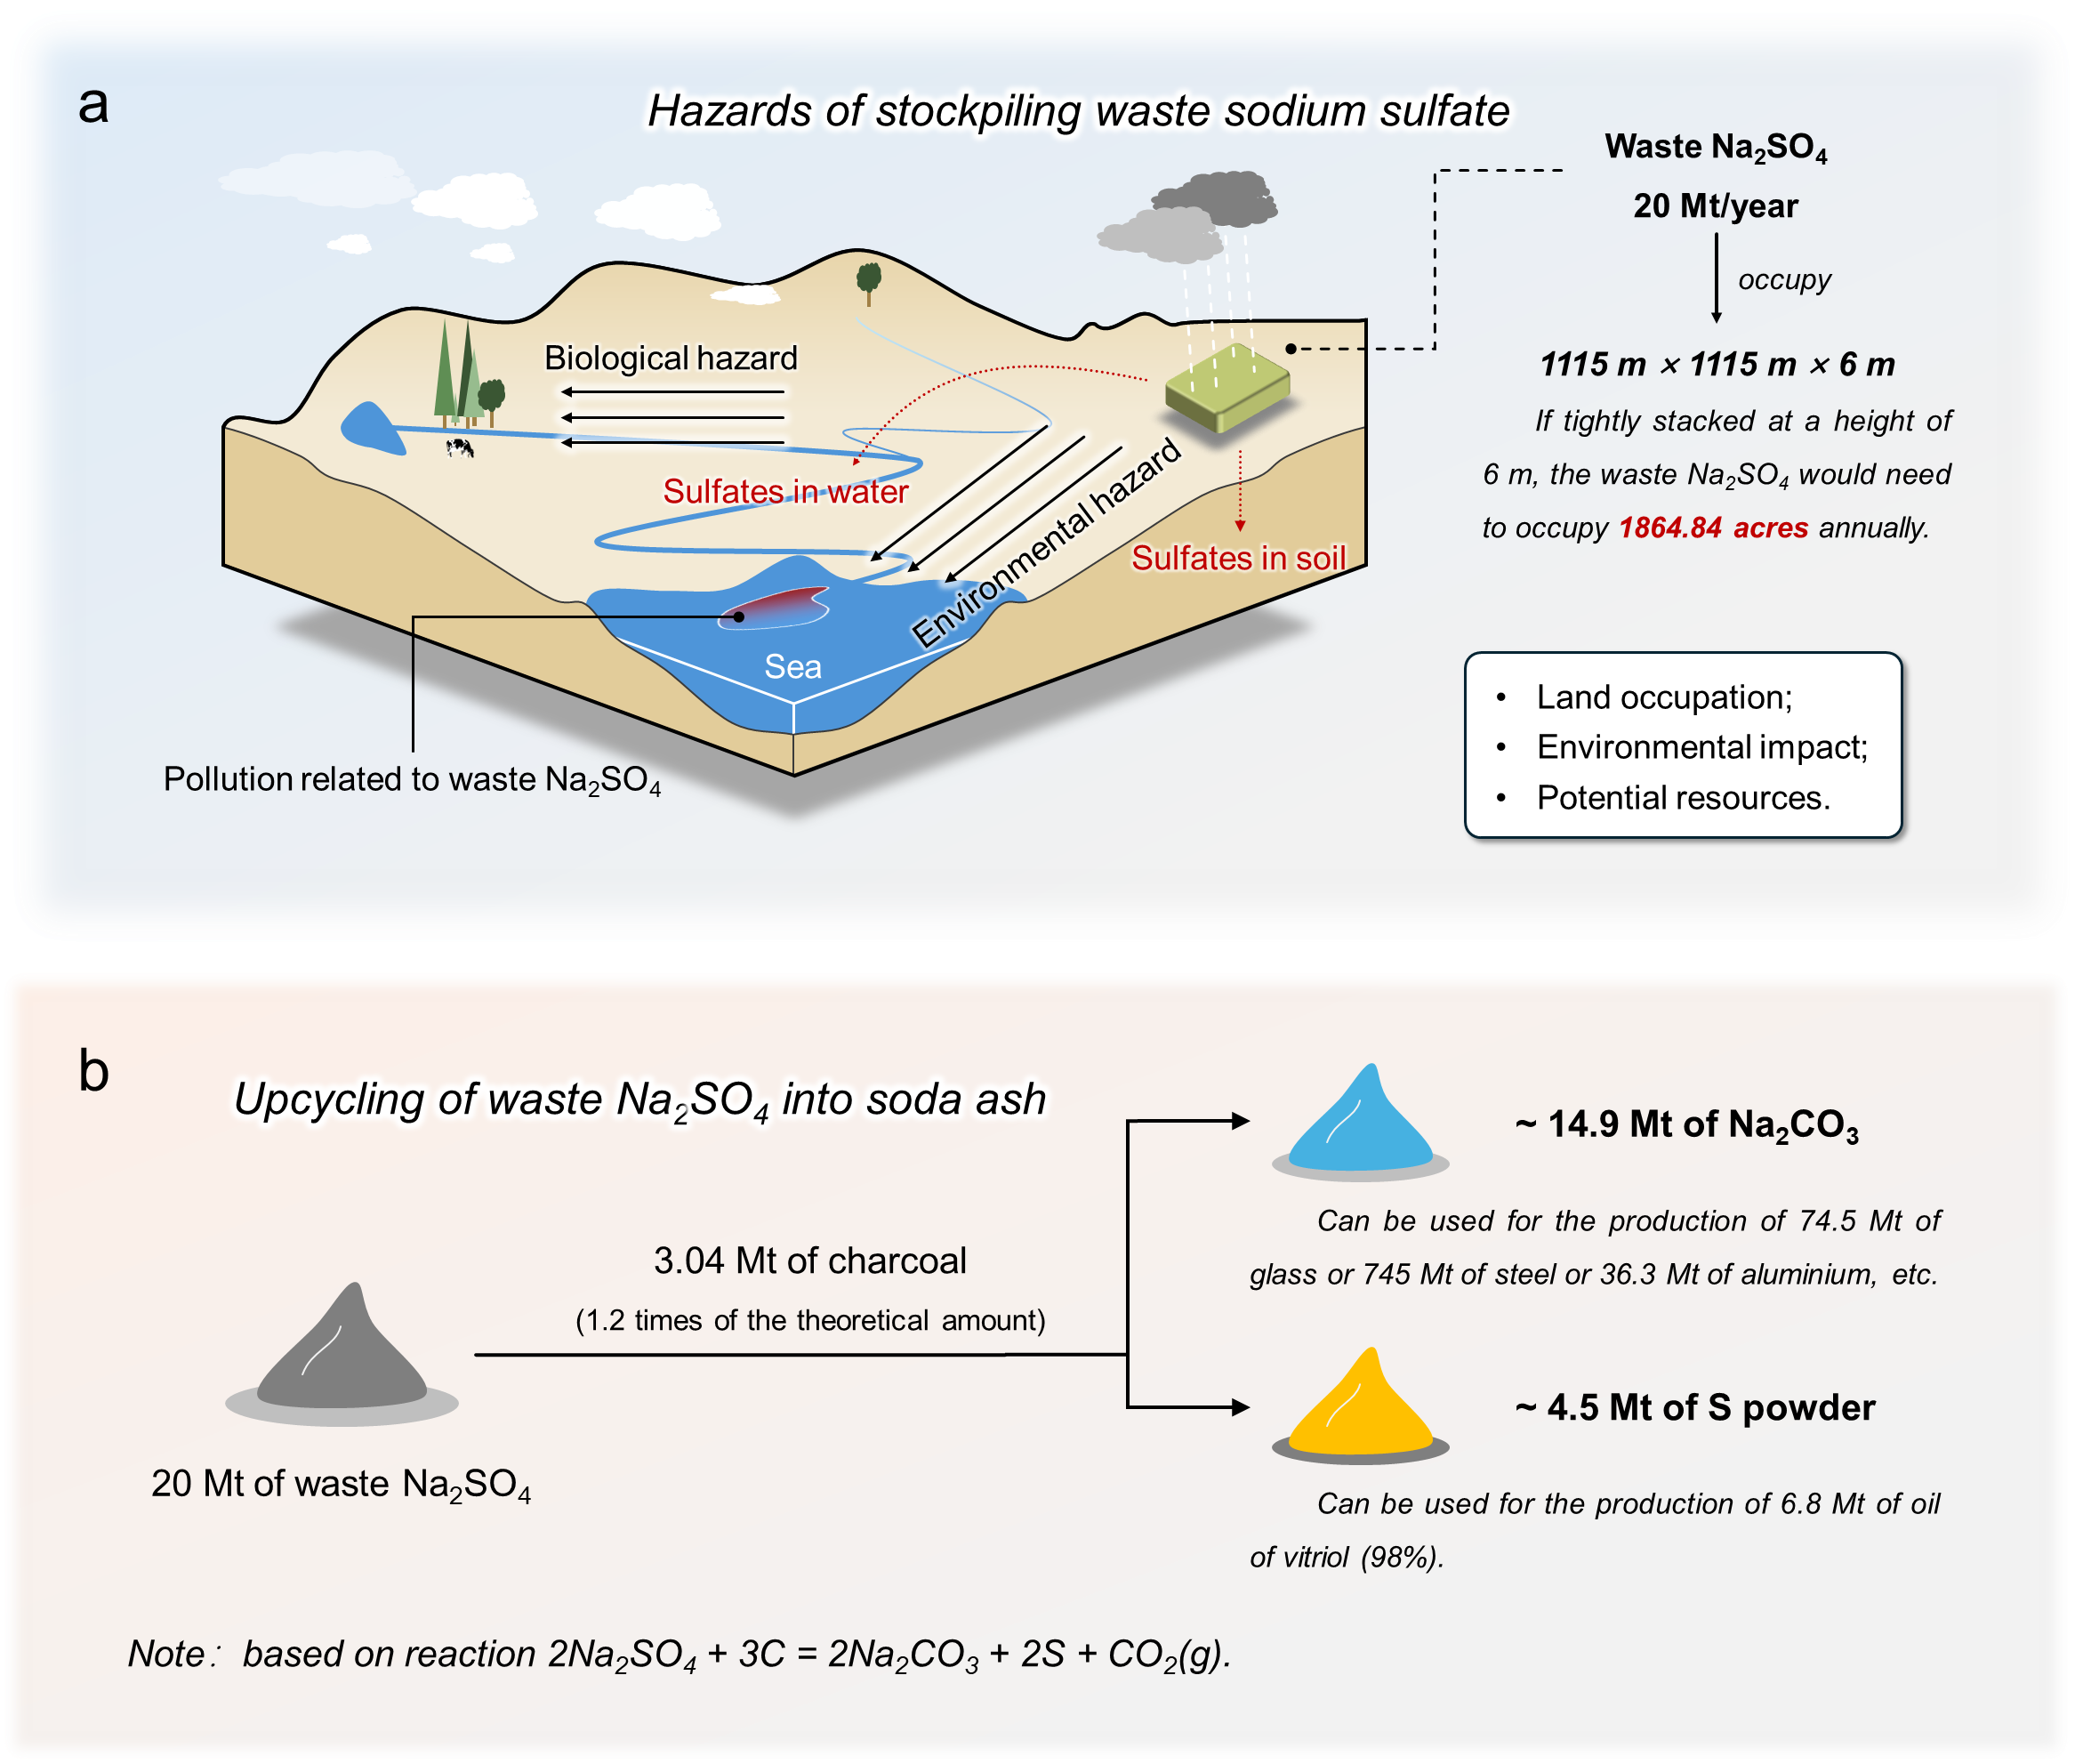


**Fig. S28.** (a) Hazards of stockpiling waste sodium sulfate. (b) Through this work, 20 Mt of waste Na2SO4 can be solved every year for the production of 14.9 Mt of Na2CO3 and 4.5 Mt of S powder.

**References**

1. Gao, W., Fang, Q., Yan, H., Wei, X. & Wu, K. Recovery of Acid and Base from Sodium Sulfate Containing Lithium Carbonate Using Bipolar Membrane Electrodialysis. *Membranes* **11**, 152 (2021).

2. Lee, D., Ho Yun, T., Gi Min, J., Byun, Y. & Yim, C. Regeneration of sodium bicarbonate from industrial Na-based desulfurization waste using ammonium hydroxide. *J. Ind. Eng. Chem.* **122**, 500-510 (2023).

3. Finkbeiner, M., Inaba, A., Tan, R., Christiansen, K. & Klüppel, H.-J. The New International Standards for Life Cycle Assessment: ISO 14040 and ISO 14044. *Int. J. Life Cycle Assess.* **11**, 80-85 (2006).

4. Wernet, G. et al. The ecoinvent database version 3 (part I): overview and methodology. *Int. J. Life Cycle Assess.* **21**, 1218-1230 (2016).

5. Piccinno, F., Hischier, R., Seeger, S. & Som, C. From laboratory to industrial scale: a scale-up framework for chemical processes in life cycle assessment studies. *J. Cleaner Prod.* **135**, 1085-1097 (2016).

6. Ferreira, A.G.M. & Lobo, L.Q. The low-pressure phase diagram of sulfur. *J. Chem. Thermodyn.* **43**, 95-104 (2011).
